# Supplementary material for: ImReLnc: Identifying Immune-Related LncRNA Characteristics in Human Cancers Based on Heuristic Correlation Optimization
Source: Front Genet. 2022 Jan 10;12:792541. doi: 10.3389/fgene.2021.792541 (PMC8784420; doi:10.3389/fgene.2021.792541)
Supplement: Supplementary file 5 [file Table1.XLSX]

## Sheet: Data S1
Data S1. LncRNA-related cancers.
LncRNA	Cancers
LINC00861	BRCA,GBM,OV,LUAD,UCEC,KIRC,HNSC,LGG,THCA,LUSC,PRAD,SKCM,COAD,STAD,BLCA,LIHC,CESC,KIRP,SARC,LAML,PAAD,ESCA,PCPG,READ,TGCT,THYM,KICH,ACC,MESO,UVM,DLBC,CHOL
PCED1B-AS1	BRCA,GBM,OV,LUAD,UCEC,KIRC,HNSC,LGG,THCA,LUSC,PRAD,SKCM,COAD,STAD,BLCA,LIHC,CESC,KIRP,SARC,LAML,PAAD,ESCA,PCPG,READ,TGCT,KICH,ACC,MESO,UVM,UCS,CHOL
PSMB8-AS1	BRCA,GBM,OV,LUAD,UCEC,KIRC,HNSC,LGG,THCA,LUSC,PRAD,SKCM,COAD,STAD,BLCA,LIHC,CESC,KIRP,SARC,LAML,PAAD,ESCA,PCPG,TGCT,THYM,KICH,ACC,MESO,UVM,UCS,CHOL
HCP5	BRCA,GBM,OV,LUAD,UCEC,KIRC,HNSC,LGG,THCA,LUSC,PRAD,SKCM,COAD,STAD,BLCA,LIHC,CESC,SARC,LAML,PAAD,ESCA,PCPG,READ,TGCT,THYM,KICH,ACC,MESO,UVM,UCS
HLA-DQB1-AS1	BRCA,GBM,OV,LUAD,UCEC,KIRC,HNSC,LGG,THCA,LUSC,PRAD,SKCM,COAD,STAD,BLCA,LIHC,CESC,KIRP,SARC,LAML,PAAD,ESCA,PCPG,TGCT,KICH,ACC,MESO,DLBC,UCS,CHOL
RP11-399O19.9	BRCA,GBM,OV,LUAD,UCEC,HNSC,LGG,THCA,LUSC,PRAD,SKCM,COAD,STAD,BLCA,LIHC,CESC,SARC,LAML,PAAD,ESCA,READ,TGCT,THYM,KICH,ACC,MESO,UVM,DLBC,UCS,CHOL
AC006129.2	BRCA,GBM,OV,LUAD,KIRC,HNSC,LGG,THCA,LUSC,PRAD,SKCM,COAD,STAD,BLCA,LIHC,CESC,KIRP,SARC,LAML,PAAD,ESCA,READ,TGCT,THYM,KICH,MESO,UVM,UCS,CHOL
RP11-284N8.3	BRCA,OV,LUAD,KIRC,HNSC,THCA,LUSC,PRAD,SKCM,COAD,STAD,BLCA,LIHC,CESC,KIRP,SARC,LAML,PAAD,ESCA,PCPG,READ,TGCT,THYM,KICH,ACC,MESO,UVM,DLBC,CHOL
RP11-389C8.2	BRCA,GBM,LUAD,UCEC,KIRC,HNSC,THCA,LUSC,PRAD,SKCM,COAD,STAD,BLCA,LIHC,SARC,LAML,PAAD,ESCA,PCPG,READ,THYM,KICH,ACC,MESO,UVM,DLBC,UCS,CHOL
RP11-848P1.3	BRCA,GBM,OV,LUAD,UCEC,KIRC,HNSC,LGG,THCA,LUSC,SKCM,BLCA,CESC,KIRP,SARC,LAML,PAAD,ESCA,PCPG,TGCT,THYM,KICH,ACC,MESO,UVM,DLBC,UCS,CHOL
AC092580.4	BRCA,OV,LUAD,UCEC,HNSC,THCA,LUSC,PRAD,SKCM,COAD,STAD,BLCA,LIHC,CESC,KIRP,SARC,LAML,PAAD,ESCA,PCPG,READ,TGCT,THYM,KICH,MESO,DLBC,CHOL
LLNLR-470E3.1	BRCA,GBM,OV,LUAD,KIRC,HNSC,LGG,THCA,LUSC,PRAD,SKCM,STAD,LIHC,CESC,KIRP,SARC,LAML,PAAD,ESCA,PCPG,TGCT,KICH,ACC,MESO,UVM,UCS,CHOL
CTD-2521M24.9	BRCA,GBM,OV,LUAD,UCEC,KIRC,LGG,THCA,LUSC,SKCM,COAD,STAD,BLCA,LIHC,KIRP,SARC,LAML,PAAD,ESCA,PCPG,READ,TGCT,KICH,MESO,UVM,UCS
ITGB2-AS1	BRCA,UCEC,KIRC,HNSC,LGG,THCA,LUSC,PRAD,SKCM,COAD,STAD,BLCA,LIHC,KIRP,SARC,LAML,PCPG,READ,TGCT,THYM,KICH,ACC,UVM,DLBC,UCS,CHOL
RP11-750H9.5	GBM,OV,LUAD,KIRC,HNSC,LGG,THCA,LUSC,PRAD,SKCM,COAD,STAD,BLCA,LIHC,CESC,KIRP,SARC,PAAD,ESCA,READ,TGCT,THYM,ACC,MESO,UCS,CHOL
TRG-AS1	BRCA,GBM,OV,LUAD,UCEC,KIRC,HNSC,LGG,THCA,LUSC,SKCM,COAD,STAD,BLCA,LIHC,CESC,KIRP,SARC,PAAD,ESCA,READ,THYM,KICH,MESO,UVM,CHOL
AC011899.9	GBM,OV,LUAD,UCEC,KIRC,LGG,THCA,LUSC,SKCM,BLCA,LIHC,CESC,KIRP,SARC,PAAD,PCPG,READ,TGCT,THYM,KICH,MESO,UVM,DLBC,UCS,CHOL
KIAA0125	BRCA,UCEC,KIRC,HNSC,THCA,LUSC,PRAD,SKCM,COAD,STAD,BLCA,LIHC,CESC,KIRP,SARC,PAAD,ESCA,READ,TGCT,THYM,KICH,ACC,MESO,UCS,CHOL
RP4-647J21.1	BRCA,GBM,OV,LUAD,KIRC,HNSC,THCA,LUSC,SKCM,COAD,STAD,BLCA,LIHC,CESC,KIRP,SARC,LAML,PAAD,ESCA,TGCT,THYM,KICH,MESO,UVM,CHOL
RP5-1091N2.9	BRCA,GBM,OV,LUAD,KIRC,HNSC,LGG,THCA,LUSC,SKCM,BLCA,LIHC,CESC,KIRP,SARC,PAAD,ESCA,TGCT,THYM,KICH,ACC,MESO,UVM,DLBC,CHOL
RP11-54O7.3	GBM,OV,THCA,LUSC,PRAD,SKCM,COAD,STAD,BLCA,LIHC,CESC,KIRP,SARC,LAML,PAAD,ESCA,READ,TGCT,THYM,KICH,ACC,MESO,DLBC,CHOL
CTB-61M7.2	GBM,OV,LUAD,HNSC,LGG,LUSC,SKCM,COAD,STAD,BLCA,CESC,SARC,LAML,PAAD,ESCA,PCPG,TGCT,KICH,ACC,MESO,DLBC,UCS,CHOL
USP30-AS1	BRCA,OV,LUAD,UCEC,KIRC,HNSC,THCA,LUSC,SKCM,COAD,STAD,BLCA,LIHC,CESC,SARC,PAAD,ESCA,TGCT,THYM,MESO,UVM,DLBC,CHOL
CTC-559E9.8	GBM,OV,UCEC,HNSC,THCA,LUSC,PRAD,SKCM,COAD,STAD,BLCA,SARC,LAML,PAAD,TGCT,THYM,KICH,ACC,MESO,UVM,UCS,CHOL
DBH-AS1	BRCA,LUAD,UCEC,HNSC,THCA,LUSC,PRAD,SKCM,STAD,BLCA,CESC,SARC,PAAD,ESCA,TGCT,THYM,KICH,ACC,MESO,DLBC,UCS,CHOL
LINC00426	BRCA,OV,LUAD,UCEC,KIRC,HNSC,LUSC,PRAD,STAD,BLCA,CESC,KIRP,SARC,LAML,PAAD,ESCA,TGCT,THYM,ACC,MESO,UCS,CHOL
LINC01094	BRCA,GBM,OV,LUAD,UCEC,KIRC,LGG,THCA,SKCM,COAD,STAD,BLCA,KIRP,PAAD,PCPG,READ,TGCT,THYM,KICH,MESO,DLBC,UCS
PRKCQ-AS1	BRCA,GBM,LUAD,UCEC,HNSC,THCA,LUSC,SKCM,COAD,STAD,BLCA,LIHC,CESC,SARC,PAAD,ESCA,PCPG,TGCT,THYM,MESO,DLBC,CHOL
RP11-1094M14.5	BRCA,LUAD,KIRC,HNSC,THCA,LUSC,SKCM,COAD,STAD,BLCA,CESC,KIRP,SARC,LAML,PAAD,ESCA,TGCT,THYM,ACC,MESO,DLBC,CHOL
RP11-401P9.4	BRCA,GBM,LUAD,UCEC,KIRC,LGG,THCA,LUSC,PRAD,SKCM,COAD,KIRP,SARC,LAML,PAAD,ESCA,TGCT,THYM,KICH,ACC,MESO,UVM
CTD-2020K17.1	BRCA,GBM,HNSC,THCA,LUSC,SKCM,COAD,STAD,BLCA,LIHC,CESC,KIRP,SARC,PAAD,ESCA,TGCT,THYM,KICH,ACC,MESO,CHOL
CTD-3128G10.7	GBM,OV,UCEC,KIRC,LGG,THCA,SKCM,STAD,BLCA,CESC,KIRP,SARC,PAAD,ESCA,READ,TGCT,THYM,KICH,ACC,UCS,CHOL
RP11-121A8.1	GBM,OV,LUAD,KIRC,HNSC,LGG,THCA,LUSC,SKCM,COAD,STAD,BLCA,LIHC,CESC,SARC,PAAD,ESCA,KICH,UVM,DLBC,CHOL
RP11-291B21.2	BRCA,OV,LUAD,UCEC,HNSC,THCA,LUSC,SKCM,COAD,STAD,BLCA,CESC,SARC,LAML,PAAD,ESCA,TGCT,THYM,MESO,UCS,CHOL
RP11-8L8.2	GBM,OV,LUAD,KIRC,LGG,THCA,LUSC,SKCM,STAD,BLCA,CESC,KIRP,SARC,PAAD,TGCT,THYM,KICH,ACC,MESO,DLBC,CHOL
RP4-575N6.4	BRCA,LUAD,KIRC,HNSC,LGG,THCA,LUSC,PRAD,SKCM,KIRP,SARC,PAAD,ESCA,PCPG,TGCT,THYM,KICH,MESO,DLBC,UCS,CHOL
AC104820.2	BRCA,LUAD,KIRC,HNSC,THCA,LUSC,SKCM,STAD,BLCA,CESC,SARC,LAML,PAAD,ESCA,TGCT,THYM,MESO,UVM,DLBC,CHOL
RP11-180N14.1	BRCA,LUAD,LGG,THCA,LUSC,PRAD,SKCM,BLCA,KIRP,PAAD,ESCA,PCPG,READ,TGCT,THYM,ACC,MESO,UVM,DLBC,CHOL
RP11-290F5.1	BRCA,OV,LUAD,UCEC,KIRC,HNSC,THCA,LUSC,SKCM,COAD,STAD,BLCA,CESC,PAAD,ESCA,READ,TGCT,MESO,UVM,CHOL
RP11-554A11.4	BRCA,GBM,LUAD,KIRC,HNSC,LGG,THCA,LUSC,PRAD,SKCM,LIHC,KIRP,PAAD,PCPG,READ,TGCT,THYM,KICH,ACC,UCS
RP5-1171I10.5	BRCA,OV,LUAD,UCEC,HNSC,THCA,PRAD,SKCM,STAD,BLCA,CESC,KIRP,PAAD,ESCA,PCPG,TGCT,THYM,KICH,UVM,CHOL
AC109826.1	GBM,KIRC,HNSC,LGG,THCA,LUSC,COAD,STAD,BLCA,LIHC,KIRP,SARC,PAAD,TGCT,THYM,KICH,ACC,UVM,CHOL
AL928768.3	BRCA,LUAD,KIRC,HNSC,THCA,LUSC,PRAD,SKCM,COAD,STAD,BLCA,CESC,KIRP,PAAD,ESCA,READ,TGCT,MESO,CHOL
HOXA-AS3	BRCA,GBM,LUAD,LGG,LUSC,SKCM,STAD,BLCA,LIHC,CESC,SARC,PAAD,TGCT,THYM,KICH,ACC,MESO,DLBC,CHOL
LINC00892	BRCA,OV,LUAD,KIRC,HNSC,THCA,LUSC,SKCM,STAD,LIHC,CESC,SARC,PAAD,ESCA,TGCT,ACC,MESO,DLBC,CHOL
LINC01197	BRCA,LUAD,KIRC,HNSC,LGG,THCA,COAD,LIHC,KIRP,PAAD,ESCA,PCPG,TGCT,KICH,ACC,MESO,UVM,DLBC,CHOL
LINC01272	BRCA,GBM,LUAD,THCA,LUSC,STAD,BLCA,LIHC,KIRP,SARC,LAML,PAAD,PCPG,TGCT,KICH,MESO,DLBC,UCS,CHOL
RP11-1100L3.8	BRCA,LUAD,UCEC,KIRC,THCA,LUSC,SKCM,COAD,LIHC,CESC,KIRP,LAML,PAAD,ESCA,PCPG,KICH,ACC,MESO,UCS
RP11-24F11.2	GBM,OV,LUAD,HNSC,LGG,THCA,LUSC,SKCM,STAD,BLCA,KIRP,SARC,LAML,PAAD,TGCT,THYM,DLBC,UCS,CHOL
RP11-345J18.2	BRCA,GBM,OV,LUAD,UCEC,HNSC,THCA,LUSC,BLCA,CESC,LAML,PAAD,ESCA,PCPG,TGCT,KICH,DLBC,UCS,CHOL
RP11-588K22.2	GBM,OV,LUAD,KIRC,THCA,LUSC,SKCM,LIHC,SARC,PAAD,READ,TGCT,THYM,KICH,ACC,UVM,DLBC,UCS,CHOL
RP11-686D22.8	BRCA,LUAD,HNSC,LGG,LUSC,PRAD,SKCM,STAD,BLCA,CESC,KIRP,LAML,PAAD,ESCA,PCPG,TGCT,KICH,ACC,UCS
RP3-395M20.8	GBM,OV,LUAD,UCEC,HNSC,LGG,THCA,LUSC,PRAD,SKCM,CESC,SARC,PCPG,TGCT,KICH,ACC,MESO,UVM,UCS
AC006126.4	GBM,LUAD,KIRC,HNSC,THCA,PRAD,BLCA,LIHC,KIRP,PAAD,ESCA,PCPG,TGCT,THYM,KICH,ACC,MESO,CHOL
CADM3-AS1	BRCA,LUAD,THCA,LUSC,SKCM,COAD,CESC,KIRP,SARC,LAML,PAAD,ESCA,THYM,KICH,ACC,MESO,UVM,CHOL
CTA-384D8.35	BRCA,KIRC,HNSC,THCA,SKCM,STAD,BLCA,LIHC,CESC,SARC,PAAD,ESCA,TGCT,KICH,MESO,UVM,DLBC,CHOL
FLG-AS1	BRCA,LUAD,KIRC,THCA,LUSC,SKCM,LIHC,KIRP,SARC,LAML,ESCA,PCPG,TGCT,KICH,MESO,UVM,UCS,CHOL
HOXA11-AS	KIRC,HNSC,LGG,LUSC,SKCM,LIHC,KIRP,LAML,PAAD,ESCA,PCPG,READ,TGCT,KICH,ACC,MESO,UVM,DLBC
RP11-219E7.1	GBM,KIRC,HNSC,LGG,THCA,LUSC,SKCM,STAD,BLCA,CESC,KIRP,SARC,LAML,PAAD,TGCT,KICH,ACC,CHOL
AC079767.4	BRCA,LUAD,KIRC,THCA,LUSC,SKCM,STAD,BLCA,CESC,KIRP,PAAD,ESCA,TGCT,KICH,MESO,UVM,CHOL
AC141928.1	BRCA,OV,LUAD,KIRC,THCA,PRAD,SKCM,CESC,SARC,LAML,TGCT,THYM,KICH,ACC,UVM,DLBC,CHOL
DPP10-AS1	BRCA,OV,LUAD,KIRC,HNSC,THCA,LUSC,SKCM,BLCA,KIRP,SARC,LAML,ESCA,TGCT,ACC,UVM,CHOL
NR2F1-AS1	BRCA,THCA,PRAD,SKCM,LIHC,KIRP,PAAD,PCPG,READ,TGCT,THYM,KICH,ACC,MESO,UVM,UCS,CHOL
RP11-161M6.2	BRCA,GBM,LGG,THCA,LUSC,SKCM,CESC,LAML,ESCA,PCPG,TGCT,THYM,KICH,ACC,UVM,DLBC,CHOL
RP11-455F5.5	BRCA,GBM,OV,LUAD,KIRC,THCA,SKCM,STAD,CESC,KIRP,SARC,LAML,PAAD,ESCA,TGCT,MESO,CHOL
RP11-594N15.3	BRCA,GBM,OV,LUAD,KIRC,LGG,LUSC,SKCM,STAD,BLCA,KIRP,SARC,LAML,PAAD,ACC,MESO,CHOL
SOCS2-AS1	BRCA,GBM,LUAD,KIRC,HNSC,LGG,THCA,SKCM,KIRP,SARC,READ,TGCT,ACC,MESO,UVM,DLBC,CHOL
TNRC6C-AS1	GBM,UCEC,KIRC,THCA,PRAD,SKCM,STAD,LIHC,KIRP,SARC,LAML,PAAD,PCPG,TGCT,KICH,ACC,MESO
AC007743.1	BRCA,OV,LUAD,KIRC,THCA,LUSC,PRAD,BLCA,CESC,KIRP,SARC,PAAD,ESCA,TGCT,THYM,ACC
AC104699.1	BRCA,KIRC,HNSC,THCA,LUSC,SKCM,COAD,STAD,BLCA,CESC,PAAD,READ,TGCT,THYM,MESO,CHOL
AC115522.3	BRCA,LUAD,KIRC,THCA,LUSC,PRAD,COAD,STAD,BLCA,CESC,SARC,LAML,PAAD,ESCA,MESO,CHOL
CTA-384D8.31	BRCA,OV,UCEC,HNSC,THCA,SKCM,STAD,BLCA,CESC,KIRP,SARC,PAAD,THYM,MESO,DLBC,CHOL
CTD-2619J13.17	GBM,LUAD,THCA,LUSC,COAD,BLCA,KIRP,SARC,LAML,PAAD,TGCT,THYM,KICH,MESO,DLBC,CHOL
FEZF1-AS1	GBM,LUAD,HNSC,LGG,LUSC,PRAD,SKCM,BLCA,LIHC,READ,TGCT,THYM,ACC,MESO,UCS,CHOL
HOXB-AS1	BRCA,GBM,OV,UCEC,LGG,LUSC,PRAD,SKCM,BLCA,SARC,LAML,PAAD,TGCT,UVM,DLBC,CHOL
PCAT19	BRCA,GBM,LUAD,KIRC,LGG,THCA,LUSC,SKCM,BLCA,SARC,PAAD,ESCA,TGCT,KICH,UVM,CHOL
RP11-175K6.1	BRCA,KIRC,HNSC,THCA,LUSC,PRAD,KIRP,SARC,LAML,PAAD,PCPG,TGCT,THYM,KICH,MESO,UVM
RP11-268J15.5	GBM,OV,THCA,LUSC,SKCM,SARC,LAML,PAAD,ESCA,PCPG,TGCT,THYM,KICH,ACC,MESO,CHOL
RP11-367G6.3	BRCA,THCA,LUSC,SKCM,BLCA,LIHC,CESC,KIRP,SARC,PAAD,ESCA,TGCT,THYM,KICH,UVM,CHOL
RP11-383H13.1	GBM,KIRC,THCA,LUSC,PRAD,COAD,LAML,PAAD,READ,TGCT,THYM,KICH,ACC,MESO,DLBC,CHOL
RP11-672A2.4	BRCA,GBM,LUAD,KIRC,LUSC,PRAD,SKCM,KIRP,SARC,PAAD,ESCA,PCPG,TGCT,KICH,MESO,CHOL
RP11-713M15.2	BRCA,OV,LUSC,PRAD,SKCM,COAD,CESC,KIRP,SARC,PCPG,READ,TGCT,ACC,MESO,DLBC,CHOL
RP11-747H7.3	GBM,LUAD,LGG,LUSC,SKCM,COAD,LAML,PAAD,PCPG,TGCT,THYM,ACC,MESO,UVM,DLBC,CHOL
RP6-159A1.4	GBM,LGG,THCA,LUSC,SKCM,COAD,STAD,BLCA,SARC,PAAD,PCPG,READ,TGCT,KICH,ACC,CHOL
AC005754.8	GBM,OV,UCEC,KIRC,LGG,THCA,SARC,ESCA,PCPG,TGCT,KICH,ACC,MESO,UCS,CHOL
AC093673.5	LUAD,LGG,THCA,PRAD,SKCM,STAD,BLCA,KIRP,SARC,TGCT,KICH,ACC,MESO,DLBC,UCS
AC116366.6	BRCA,LUAD,KIRC,HNSC,LUSC,SKCM,COAD,STAD,LAML,PAAD,ESCA,PCPG,TGCT,THYM,DLBC
AL450992.2	OV,LUAD,KIRC,THCA,LUSC,SKCM,BLCA,LAML,PAAD,TGCT,THYM,ACC,MESO,DLBC,CHOL
CTA-384D8.36	BRCA,GBM,UCEC,KIRC,HNSC,THCA,LUSC,COAD,BLCA,CESC,LAML,TGCT,THYM,MESO,UVM
CTC-378H22.2	BRCA,LUAD,KIRC,LGG,THCA,LUSC,SKCM,BLCA,KIRP,SARC,LAML,PAAD,ESCA,THYM,KICH
CTD-2231H16.1	GBM,OV,LUAD,KIRC,THCA,LUSC,PRAD,BLCA,CESC,KIRP,SARC,LAML,TGCT,KICH,ACC
DLX6-AS1	LUAD,UCEC,KIRC,HNSC,LUSC,COAD,STAD,BLCA,CESC,SARC,ESCA,TGCT,ACC,MESO,CHOL
FENDRR	LUAD,KIRC,PRAD,SKCM,LIHC,SARC,PAAD,ESCA,PCPG,READ,TGCT,KICH,DLBC,UCS,CHOL
GAS5	GBM,LUAD,KIRC,LUSC,SKCM,COAD,BLCA,KIRP,LAML,TGCT,THYM,MESO,UVM,DLBC,CHOL
HHIP-AS1	LUAD,KIRC,THCA,LUSC,PRAD,SKCM,LIHC,CESC,SARC,LAML,READ,TGCT,KICH,MESO,CHOL
LINC01281	BRCA,LUAD,UCEC,HNSC,THCA,LUSC,SKCM,STAD,BLCA,CESC,PAAD,TGCT,THYM,DLBC,CHOL
NRIR	BRCA,GBM,OV,UCEC,HNSC,LGG,SKCM,BLCA,CESC,LAML,PAAD,ESCA,TGCT,MESO,UCS
RP1-228H13.5	GBM,OV,LUAD,THCA,PRAD,SKCM,CESC,SARC,PAAD,TGCT,THYM,KICH,ACC,UVM,CHOL
RP1-244F24.1	GBM,OV,UCEC,THCA,SKCM,STAD,BLCA,CESC,PAAD,ESCA,PCPG,THYM,ACC,DLBC,CHOL
RP1-86C11.7	GBM,HNSC,LGG,LUSC,PRAD,SKCM,LIHC,CESC,ESCA,READ,TGCT,KICH,UVM,DLBC,CHOL
RP11-1024P17.1	BRCA,LUAD,KIRC,THCA,LUSC,PRAD,SKCM,CESC,SARC,PAAD,ESCA,READ,KICH,ACC,MESO
RP11-1149O23.2	BRCA,GBM,OV,KIRC,THCA,LUSC,SKCM,BLCA,LIHC,SARC,TGCT,THYM,KICH,UVM,UCS
RP11-148O21.2	BRCA,LUAD,HNSC,LGG,THCA,LUSC,SKCM,STAD,BLCA,LAML,PAAD,ESCA,TGCT,MESO,CHOL
RP11-222K16.2	BRCA,OV,KIRC,THCA,STAD,LIHC,CESC,KIRP,LAML,PAAD,TGCT,MESO,UVM,DLBC,CHOL
RP11-25K19.1	BRCA,LUAD,HNSC,THCA,LUSC,SKCM,BLCA,CESC,KIRP,LAML,ESCA,READ,TGCT,THYM,KICH
RP11-288L9.4	BRCA,GBM,OV,UCEC,HNSC,LUSC,SKCM,BLCA,CESC,ESCA,TGCT,THYM,ACC,MESO,CHOL
RP11-299G20.2	BRCA,OV,LUAD,KIRC,LUSC,SKCM,STAD,BLCA,CESC,SARC,PCPG,THYM,ACC,MESO,CHOL
RP11-420L9.5	HNSC,LGG,LUSC,PRAD,SKCM,BLCA,CESC,KIRP,LAML,PAAD,READ,TGCT,THYM,KICH,DLBC
RP5-887A10.1	BRCA,LUAD,HNSC,THCA,LUSC,PRAD,SKCM,COAD,STAD,BLCA,PAAD,ESCA,READ,TGCT,KICH
RP5-899E9.1	GBM,LUAD,KIRC,LUSC,SKCM,BLCA,CESC,KIRP,SARC,PAAD,TGCT,ACC,DLBC,UCS,CHOL
SH3RF3-AS1	BRCA,LUAD,LUSC,SKCM,BLCA,LIHC,KIRP,SARC,LAML,PAAD,TGCT,THYM,KICH,UCS,CHOL
TGFB2-AS1	OV,LUAD,KIRC,LGG,THCA,LUSC,SKCM,COAD,BLCA,SARC,PAAD,TGCT,THYM,KICH,UCS
TRHDE-AS1	BRCA,LUAD,KIRC,LUSC,PRAD,BLCA,LIHC,KIRP,SARC,PCPG,TGCT,THYM,ACC,MESO,CHOL
AC009950.2	BRCA,GBM,OV,HNSC,LUSC,SKCM,STAD,BLCA,CESC,LAML,ESCA,PCPG,TGCT,THYM
AC133644.2	OV,KIRC,HNSC,THCA,SKCM,STAD,BLCA,CESC,PAAD,PCPG,TGCT,MESO,UVM,DLBC
AC147651.4	BRCA,GBM,LGG,THCA,LUSC,BLCA,SARC,PAAD,TGCT,THYM,KICH,ACC,MESO,CHOL
ALDH1L1-AS2	BRCA,KIRC,PRAD,COAD,CESC,KIRP,SARC,PCPG,TGCT,THYM,KICH,ACC,UVM,CHOL
COLCA1	KIRC,THCA,SKCM,COAD,BLCA,CESC,SARC,READ,TGCT,THYM,KICH,ACC,MESO,CHOL
CRNDE	BRCA,GBM,OV,LGG,BLCA,LIHC,KIRP,SARC,LAML,ESCA,TGCT,KICH,UVM,UCS
CTD-2369P2.8	GBM,OV,LUAD,THCA,LUSC,SKCM,BLCA,CESC,LAML,ESCA,KICH,MESO,DLBC,UCS
CTD-3064M3.3	LUAD,KIRC,HNSC,LUSC,PRAD,KIRP,SARC,LAML,ESCA,TGCT,KICH,ACC,UVM,CHOL
DIO3OS	LUAD,THCA,LUSC,PRAD,SKCM,LIHC,KIRP,SARC,PCPG,TGCT,KICH,ACC,MESO,CHOL
EPB41L4A-AS2	OV,HNSC,LGG,LUSC,SKCM,STAD,LIHC,CESC,SARC,READ,TGCT,MESO,UVM,UCS
FAM201A	HNSC,THCA,LUSC,BLCA,CESC,SARC,ESCA,TGCT,THYM,ACC,MESO,DLBC,UCS,CHOL
GNG12-AS1	OV,LUAD,LGG,LUSC,PRAD,SKCM,CESC,SARC,LAML,PAAD,ESCA,TGCT,THYM,CHOL
HAND2-AS1	BRCA,LGG,THCA,PRAD,SKCM,LIHC,SARC,PAAD,READ,TGCT,THYM,ACC,MESO,CHOL
HAS2-AS1	LUAD,UCEC,LGG,THCA,LUSC,COAD,KIRP,LAML,PAAD,TGCT,THYM,KICH,MESO,CHOL
L3MBTL4-AS1	BRCA,GBM,KIRC,LGG,BLCA,CESC,KIRP,LAML,PAAD,TGCT,THYM,KICH,DLBC,CHOL
LINC00582	BRCA,LUAD,HNSC,THCA,LUSC,SKCM,STAD,BLCA,CESC,PAAD,READ,TGCT,MESO,CHOL
LINC00854	BRCA,LGG,LUSC,STAD,BLCA,LIHC,CESC,SARC,ESCA,KICH,ACC,MESO,DLBC,UCS
LINC00982	BRCA,LUAD,KIRC,THCA,PRAD,LIHC,CESC,KIRP,PCPG,TGCT,THYM,MESO,UVM,UCS
LINC01215	BRCA,LUAD,THCA,PRAD,SKCM,COAD,STAD,LIHC,PAAD,TGCT,THYM,MESO,UCS,CHOL
MIR155HG	BRCA,LUAD,KIRC,THCA,LUSC,SKCM,BLCA,LIHC,PAAD,TGCT,THYM,KICH,UVM,CHOL
MYCNOS	GBM,OV,LUAD,LGG,THCA,SKCM,BLCA,CESC,LAML,TGCT,THYM,KICH,UVM,UCS
OR2A1-AS1	BRCA,OV,THCA,LUSC,COAD,BLCA,KIRP,SARC,LAML,PAAD,THYM,KICH,DLBC,CHOL
PAX8-AS1	BRCA,GBM,LUAD,HNSC,LUSC,PRAD,SKCM,SARC,PAAD,ESCA,KICH,UVM,DLBC,CHOL
RP1-167F1.2	GBM,OV,LUAD,LGG,THCA,BLCA,CESC,KIRP,SARC,ESCA,TGCT,THYM,KICH,UCS
RP1-18D14.7	BRCA,GBM,LUAD,LGG,THCA,LIHC,SARC,LAML,ESCA,PCPG,THYM,KICH,ACC,CHOL
RP1-193H18.2	BRCA,LUAD,THCA,PRAD,BLCA,LIHC,CESC,SARC,LAML,TGCT,ACC,MESO,DLBC,CHOL
RP1-309I22.2	KIRC,HNSC,LUSC,PRAD,LIHC,KIRP,SARC,LAML,PAAD,TGCT,THYM,KICH,UVM,CHOL
RP11-1191J2.5	HNSC,LGG,LUSC,PRAD,SKCM,LIHC,CESC,SARC,PAAD,TGCT,THYM,KICH,ACC,CHOL
RP11-174G6.5	LGG,LUSC,PRAD,CESC,KIRP,SARC,LAML,PAAD,TGCT,KICH,ACC,MESO,UVM,CHOL
RP11-273G15.2	BRCA,OV,LUAD,THCA,STAD,BLCA,LIHC,LAML,PAAD,THYM,KICH,ACC,UVM,CHOL
RP11-65I12.1	BRCA,GBM,HNSC,LGG,PRAD,SKCM,BLCA,KIRP,SARC,LAML,PAAD,READ,TGCT,DLBC
RP11-693J15.5	BRCA,LUAD,THCA,LUSC,PRAD,SKCM,STAD,CESC,LAML,PAAD,ESCA,TGCT,THYM,CHOL
RP11-715J22.6	GBM,OV,LUAD,UCEC,LGG,SKCM,CESC,SARC,ESCA,TGCT,KICH,ACC,MESO,UCS
RP11-731F5.2	LUAD,KIRC,HNSC,THCA,SKCM,STAD,BLCA,KIRP,PAAD,ESCA,TGCT,THYM,MESO,CHOL
RP11-789C17.1	BRCA,OV,LUAD,UCEC,LUSC,BLCA,LIHC,CESC,LAML,ESCA,TGCT,THYM,UVM,DLBC
RP11-92C4.6	BRCA,KIRC,HNSC,THCA,SKCM,KIRP,PAAD,ESCA,PCPG,TGCT,THYM,KICH,DLBC,CHOL
RP13-514E23.1	BRCA,OV,LUAD,KIRC,HNSC,THCA,PRAD,BLCA,SARC,TGCT,THYM,ACC,MESO,DLBC
RP3-477O4.14	GBM,KIRC,LGG,THCA,SKCM,CESC,KIRP,SARC,PAAD,TGCT,THYM,ACC,MESO,CHOL
RP4-794I6.4	GBM,OV,KIRC,HNSC,THCA,LUSC,PRAD,CESC,KIRP,ESCA,TGCT,THYM,KICH,ACC
RP5-1024C24.1	GBM,OV,KIRC,HNSC,THCA,LUSC,KIRP,SARC,ESCA,TGCT,ACC,MESO,UVM,UCS
RP5-1028K7.2	BRCA,OV,LUAD,UCEC,KIRC,THCA,LIHC,SARC,TGCT,THYM,UVM,DLBC,UCS,CHOL
RP5-1054A22.4	GBM,LGG,LUSC,SKCM,LIHC,KIRP,PAAD,ESCA,PCPG,TGCT,THYM,KICH,MESO,CHOL
SNHG6	BRCA,GBM,KIRC,LUSC,SKCM,LIHC,CESC,KIRP,SARC,LAML,PCPG,KICH,DLBC,CHOL
WNT5A-AS1	LUAD,KIRC,LGG,THCA,LUSC,PRAD,SARC,ESCA,READ,TGCT,THYM,KICH,ACC,UCS
ZNF582-AS1	BRCA,OV,LUAD,KIRC,LUSC,SKCM,BLCA,CESC,KIRP,SARC,ESCA,TGCT,THYM,UVM
AC005083.1	THCA,LUSC,PRAD,SKCM,SARC,LAML,TGCT,THYM,KICH,MESO,UVM,UCS,CHOL
AC079630.4	BRCA,OV,LUAD,THCA,LUSC,PRAD,SARC,LAML,PAAD,TGCT,KICH,DLBC,CHOL
AF131215.2	BRCA,GBM,LUAD,LUSC,BLCA,KIRP,SARC,LAML,PCPG,READ,UVM,DLBC,UCS
AP001189.4	BRCA,LUAD,KIRC,LUSC,PRAD,SKCM,KIRP,LAML,PAAD,ESCA,TGCT,KICH,CHOL
BLACAT1	LUAD,LGG,THCA,PRAD,BLCA,SARC,PAAD,READ,TGCT,THYM,KICH,MESO,CHOL
CHRM3-AS2	LUAD,HNSC,THCA,COAD,BLCA,CESC,PAAD,TGCT,THYM,KICH,MESO,DLBC,CHOL
CTB-41I6.2	GBM,KIRC,LGG,SKCM,LIHC,KIRP,SARC,PAAD,TGCT,ACC,UVM,DLBC,CHOL
CTB-92J24.2	BRCA,GBM,OV,LUAD,LUSC,STAD,CESC,KIRP,SARC,LAML,PAAD,TGCT,CHOL
CTC-301O7.4	GBM,OV,KIRC,THCA,LUSC,SKCM,KIRP,SARC,LAML,PAAD,TGCT,MESO,UCS
CTD-3035K23.7	BRCA,LUAD,LGG,THCA,LUSC,PRAD,LAML,PAAD,ESCA,TGCT,KICH,UVM,CHOL
FLJ16779	GBM,OV,UCEC,KIRC,THCA,SKCM,KIRP,PAAD,TGCT,THYM,KICH,MESO,UVM
HAGLR	OV,UCEC,HNSC,THCA,LUSC,SKCM,BLCA,KIRP,LAML,PAAD,TGCT,THYM,UVM
HOXB-AS3	GBM,UCEC,KIRC,HNSC,LUSC,SKCM,STAD,KIRP,SARC,TGCT,ACC,MESO,CHOL
LBX2-AS1	UCEC,KIRC,THCA,KIRP,SARC,PCPG,TGCT,THYM,KICH,ACC,MESO,DLBC,CHOL
LINC00996	BRCA,THCA,LUSC,SKCM,COAD,STAD,BLCA,PAAD,ESCA,READ,TGCT,KICH,CHOL
LINC01355	OV,UCEC,THCA,LUSC,SKCM,COAD,STAD,TGCT,THYM,KICH,ACC,UVM,CHOL
MAGI2-AS3	BRCA,LUSC,PRAD,LAML,PAAD,ESCA,READ,TGCT,THYM,UVM,DLBC,UCS,CHOL
MIAT	KIRC,THCA,SKCM,COAD,STAD,BLCA,LIHC,KIRP,LAML,THYM,UVM,DLBC,CHOL
NR2F2-AS1	THCA,LUSC,PRAD,CESC,KIRP,SARC,PAAD,ESCA,TGCT,THYM,KICH,DLBC,UCS
PGM5-AS1	BRCA,LUAD,KIRC,PRAD,KIRP,SARC,PAAD,PCPG,READ,TGCT,THYM,ACC,UVM
RP1-37N7.1	BRCA,KIRC,HNSC,LUSC,PRAD,STAD,BLCA,KIRP,PAAD,TGCT,THYM,KICH,CHOL
RP11-1149O23.3	BRCA,OV,UCEC,THCA,SKCM,KIRP,SARC,TGCT,THYM,KICH,UVM,UCS,CHOL
RP11-115H13.1	LUAD,KIRC,HNSC,THCA,LUSC,SKCM,STAD,BLCA,KIRP,TGCT,THYM,KICH,CHOL
RP11-1334A24.6	GBM,LUAD,KIRC,THCA,LUSC,SKCM,STAD,LAML,PAAD,ESCA,TGCT,THYM,KICH
RP11-16K12.1	LUAD,HNSC,THCA,LUSC,SKCM,STAD,BLCA,LIHC,CESC,ESCA,TGCT,KICH,CHOL
RP11-210M15.2	OV,LUAD,KIRC,THCA,LUSC,BLCA,SARC,PAAD,ESCA,TGCT,ACC,UVM,CHOL
RP11-274H2.5	BRCA,UCEC,KIRC,HNSC,LGG,THCA,LUSC,CESC,THYM,ACC,MESO,UCS,CHOL
RP11-414C23.1	THCA,LUSC,COAD,STAD,KIRP,SARC,PCPG,READ,KICH,ACC,UVM,DLBC,CHOL
RP11-424G14.1	LUAD,LGG,THCA,SKCM,LIHC,KIRP,SARC,LAML,PCPG,READ,TGCT,UVM,DLBC
RP11-452I5.2	BRCA,GBM,KIRC,LUSC,SKCM,BLCA,CESC,KIRP,LAML,TGCT,KICH,ACC,DLBC
RP11-456K23.1	BRCA,OV,LUAD,THCA,LUSC,SARC,LAML,READ,TGCT,THYM,ACC,UVM,UCS
RP11-496I9.1	GBM,OV,LGG,THCA,PAAD,ESCA,TGCT,THYM,KICH,ACC,MESO,UCS,CHOL
RP11-522B15.3	BRCA,LGG,LUSC,BLCA,CESC,KIRP,SARC,PAAD,ESCA,TGCT,THYM,KICH,DLBC
RP11-524D16__A.3	GBM,LGG,THCA,LUSC,SKCM,BLCA,KIRP,PAAD,TGCT,THYM,KICH,MESO,DLBC
RP11-597D13.9	GBM,KIRC,KIRP,SARC,LAML,ESCA,PCPG,READ,TGCT,THYM,MESO,DLBC,UCS
RP11-783K16.5	GBM,OV,LUAD,HNSC,THCA,LUSC,SARC,ESCA,TGCT,THYM,KICH,MESO,UVM
RP11-999E24.3	BRCA,GBM,OV,LUAD,KIRC,HNSC,PRAD,SKCM,STAD,SARC,THYM,ACC,MESO
RP3-525N10.2	LUAD,THCA,SKCM,BLCA,SARC,LAML,ESCA,TGCT,THYM,KICH,ACC,MESO,UCS
RP4-813D12.3	OV,UCEC,HNSC,LUSC,PRAD,BLCA,KIRP,ESCA,READ,TGCT,KICH,DLBC,UCS
RP5-1056H1.2	LUAD,UCEC,KIRC,LGG,LUSC,PRAD,SARC,TGCT,THYM,KICH,ACC,UCS,CHOL
RP6-24A23.3	BRCA,UCEC,THCA,LUSC,SKCM,BLCA,CESC,KIRP,SARC,TGCT,THYM,KICH,MESO
SENCR	KIRC,LGG,LUSC,SKCM,STAD,CESC,KIRP,SARC,PAAD,TGCT,ACC,UVM,CHOL
SHANK3	LUAD,KIRC,THCA,PRAD,SARC,PAAD,PCPG,THYM,KICH,ACC,MESO,DLBC,CHOL
SOX21-AS1	OV,UCEC,KIRC,HNSC,LUSC,PRAD,STAD,BLCA,SARC,ESCA,TGCT,THYM,ACC
ST3GAL6-AS1	LGG,THCA,LUSC,BLCA,CESC,KIRP,SARC,TGCT,THYM,KICH,MESO,UVM,CHOL
ZNF528-AS1	GBM,OV,HNSC,SKCM,SARC,LAML,PAAD,THYM,KICH,MESO,DLBC,UCS,CHOL
AC007386.4	BRCA,LUAD,HNSC,THCA,LUSC,SKCM,STAD,BLCA,CESC,PAAD,TGCT,MESO
AC025165.8	GBM,OV,LGG,LUSC,SKCM,SARC,LAML,READ,THYM,KICH,ACC,MESO
AC129492.6	BRCA,HNSC,LUSC,COAD,STAD,CESC,LAML,ESCA,TGCT,KICH,MESO,CHOL
ADAMTS9-AS1	BRCA,LUAD,KIRC,THCA,PRAD,SKCM,KIRP,PAAD,ESCA,PCPG,TGCT,UVM
AF131215.9	BRCA,GBM,OV,LUAD,KIRC,LUSC,CESC,LAML,ESCA,TGCT,DLBC,CHOL
AP001610.5	BRCA,GBM,OV,HNSC,LUSC,STAD,BLCA,CESC,LAML,ESCA,THYM,MESO
BVES-AS1	GBM,OV,LGG,THCA,PRAD,SKCM,KIRP,PCPG,TGCT,KICH,UCS,CHOL
CHL1-AS2	BRCA,GBM,LUAD,KIRC,HNSC,PRAD,SKCM,SARC,KICH,ACC,MESO,UVM
CTD-2547G23.4	GBM,LUAD,HNSC,LGG,THCA,PRAD,COAD,READ,THYM,KICH,UVM,CHOL
CTD-3065J16.9	OV,LUAD,UCEC,THCA,LAML,PAAD,ESCA,TGCT,THYM,MESO,UCS,CHOL
EMX2OS	BRCA,GBM,OV,KIRC,THCA,PRAD,SKCM,SARC,PAAD,READ,TGCT,MESO
FAM83H-AS1	BRCA,GBM,LUAD,LUSC,PRAD,SKCM,SARC,ESCA,TGCT,THYM,MESO,CHOL
FOXD2-AS1	OV,UCEC,LGG,LUSC,PRAD,SKCM,SARC,ESCA,TGCT,THYM,KICH,MESO
FOXD3-AS1	OV,LUAD,HNSC,LGG,PRAD,BLCA,SARC,PCPG,TGCT,ACC,MESO,CHOL
FZD10-AS1	BRCA,OV,LUAD,THCA,PRAD,SKCM,KIRP,SARC,PCPG,KICH,MESO,UCS
GDNF-AS1	OV,KIRC,HNSC,LGG,LUSC,CESC,KIRP,SARC,TGCT,THYM,KICH,UCS
HID1-AS1	LUAD,KIRC,THCA,LUSC,LIHC,KIRP,SARC,PCPG,THYM,ACC,MESO,CHOL
HOTTIP	GBM,HNSC,LGG,LUSC,PRAD,SKCM,LIHC,SARC,ESCA,TGCT,KICH,ACC
HOXC-AS3	LUAD,HNSC,LUSC,SKCM,STAD,BLCA,SARC,ESCA,TGCT,KICH,ACC,MESO
IGF2-AS	BRCA,OV,UCEC,KIRC,LUSC,BLCA,LIHC,SARC,TGCT,THYM,KICH,CHOL
LINC00152	GBM,KIRC,LGG,THCA,BLCA,PAAD,TGCT,THYM,KICH,ACC,MESO,UVM
LINC01146	GBM,OV,KIRC,LGG,THCA,LUSC,SKCM,KIRP,SARC,KICH,MESO,CHOL
LINC01537	BRCA,LUAD,KIRC,LGG,PRAD,LIHC,KIRP,SARC,PAAD,THYM,KICH,CHOL
LINC01561	KIRC,LGG,THCA,PRAD,SKCM,CESC,KIRP,SARC,READ,ACC,MESO,CHOL
MIR31HG	OV,THCA,LUSC,PRAD,BLCA,ESCA,TGCT,THYM,KICH,MESO,UCS,CHOL
PLBD1-AS1	GBM,LGG,THCA,PRAD,SKCM,SARC,LAML,PCPG,TGCT,THYM,KICH,CHOL
PTPRD-AS1	UCEC,THCA,SARC,PAAD,ESCA,READ,TGCT,THYM,KICH,MESO,UCS,CHOL
RP1-102K2.8	GBM,UCEC,KIRC,HNSC,THCA,LUSC,SKCM,TGCT,KICH,ACC,MESO,CHOL
RP11-102N12.3	BRCA,GBM,HNSC,THCA,LUSC,SKCM,STAD,SARC,LAML,ESCA,TGCT,CHOL
RP11-10N23.2	GBM,KIRC,LGG,COAD,KIRP,SARC,LAML,THYM,KICH,MESO,UVM,CHOL
RP11-159H10.3	BRCA,LUAD,LGG,LUSC,SKCM,BLCA,KIRP,SARC,LAML,ESCA,UCS,CHOL
RP11-23N2.4	LGG,THCA,SKCM,BLCA,SARC,PAAD,ESCA,TGCT,THYM,KICH,UVM,CHOL
RP11-251M1.1	BRCA,LUAD,KIRC,LUSC,KIRP,SARC,LAML,PAAD,ESCA,KICH,MESO,CHOL
RP11-274B21.9	BRCA,GBM,UCEC,LGG,LUSC,STAD,SARC,LAML,PAAD,TGCT,KICH,ACC
RP11-281O15.4	OV,LUSC,PRAD,SKCM,KIRP,SARC,PAAD,ESCA,THYM,MESO,UVM,CHOL
RP11-327F22.2	LUAD,KIRC,THCA,LUSC,SKCM,LAML,PAAD,TGCT,MESO,UVM,DLBC,CHOL
RP11-434E6.4	THCA,SKCM,COAD,LIHC,SARC,LAML,TGCT,THYM,KICH,ACC,UVM,DLBC
RP11-672L10.2	BRCA,LUAD,KIRC,HNSC,LUSC,PRAD,CESC,KIRP,PAAD,ESCA,READ,TGCT
RP11-703I16.1	BRCA,THCA,SKCM,STAD,LAML,TGCT,THYM,ACC,MESO,UVM,DLBC,CHOL
RP11-757F18.5	BRCA,GBM,OV,KIRC,THCA,SARC,READ,TGCT,KICH,ACC,MESO,CHOL
RP11-79H23.3	BRCA,HNSC,SKCM,STAD,BLCA,CESC,SARC,LAML,ESCA,TGCT,KICH,MESO
RP11-7K24.3	KIRC,HNSC,THCA,SKCM,SARC,PAAD,ESCA,THYM,KICH,MESO,UCS,CHOL
RP11-800A3.4	GBM,THCA,PRAD,STAD,SARC,PAAD,ESCA,PCPG,TGCT,THYM,KICH,CHOL
RP11-902B17.1	BRCA,BLCA,KIRP,LAML,PAAD,TGCT,ACC,MESO,UVM,DLBC,UCS,CHOL
RP11-96K19.2	KIRC,HNSC,LGG,SKCM,COAD,ESCA,PCPG,READ,TGCT,DLBC,UCS,CHOL
RP5-875H18.9	GBM,LUAD,HNSC,THCA,LUSC,SKCM,BLCA,CESC,KIRP,PAAD,ESCA,KICH
RP6-24A23.7	THCA,LUSC,PRAD,SKCM,BLCA,SARC,ESCA,TGCT,THYM,KICH,MESO,UVM
SALRNA1	BRCA,GBM,OV,LUAD,LGG,LUSC,CESC,SARC,ESCA,TGCT,THYM,UCS
SLFNL1-AS1	HNSC,LUSC,PRAD,BLCA,CESC,SARC,LAML,ESCA,TGCT,THYM,UVM,CHOL
SSTR5-AS1	LUAD,KIRC,LGG,LUSC,PRAD,CESC,SARC,READ,TGCT,KICH,UCS,CHOL
TBX2-AS1	BRCA,OV,LUAD,KIRC,HNSC,LGG,SKCM,BLCA,KIRP,SARC,PAAD,TGCT
TRPM2-AS	BRCA,OV,LUSC,PRAD,BLCA,CESC,LAML,READ,TGCT,THYM,UVM,UCS
TTN-AS1	UCEC,LGG,THCA,LIHC,CESC,LAML,ESCA,TGCT,THYM,KICH,UVM,CHOL
TTTY14	GBM,LUAD,THCA,LUSC,SKCM,KIRP,SARC,PAAD,PCPG,ACC,UVM,DLBC
UG0898H09	GBM,LUAD,UCEC,LGG,THCA,PRAD,SARC,TGCT,THYM,KICH,MESO,CHOL
VLDLR-AS1	LGG,THCA,LUSC,SKCM,BLCA,CESC,SARC,ESCA,READ,TGCT,THYM,ACC
WT1-AS	BRCA,GBM,OV,SKCM,KIRP,LAML,PAAD,TGCT,KICH,ACC,MESO,CHOL
ZNF667-AS1	BRCA,GBM,HNSC,LUSC,SKCM,LIHC,KIRP,SARC,READ,THYM,UCS,CHOL
AC004067.5	OV,KIRC,LGG,THCA,SKCM,SARC,LAML,PCPG,THYM,ACC,UVM
AC007255.8	BRCA,OV,HNSC,THCA,LUSC,COAD,BLCA,CESC,TGCT,THYM,ACC
AC069363.1	LUAD,KIRC,THCA,LUSC,CESC,KIRP,SARC,TGCT,MESO,UVM,DLBC
AC093110.3	GBM,LUAD,LUSC,BLCA,SARC,LAML,TGCT,THYM,UVM,UCS,CHOL
AC109309.4	BRCA,GBM,THCA,PRAD,KIRP,SARC,ESCA,THYM,KICH,ACC,CHOL
ACTA2-AS1	BRCA,GBM,LUSC,PRAD,KIRP,PAAD,ESCA,READ,TGCT,ACC,UCS
ARRDC1-AS1	BRCA,BLCA,LAML,PAAD,TGCT,THYM,KICH,MESO,UVM,DLBC,CHOL
ATP6V0E2-AS1	KIRC,HNSC,THCA,BLCA,LAML,PAAD,ESCA,THYM,KICH,ACC,CHOL
BX470102.3	BRCA,OV,THCA,PRAD,SKCM,BLCA,PCPG,TGCT,KICH,ACC,CHOL
C9orf173-AS1	GBM,KIRC,LGG,LUSC,SKCM,SARC,LAML,TGCT,KICH,ACC,CHOL
CTA-228A9.3	THCA,LUSC,PRAD,BLCA,SARC,PAAD,PCPG,THYM,ACC,MESO,CHOL
CTC-497E21.3	OV,LUAD,UCEC,LGG,LUSC,PRAD,COAD,STAD,BLCA,PAAD,THYM
CTD-2033D15.2	GBM,PRAD,STAD,KIRP,LAML,PAAD,ESCA,PCPG,READ,KICH,CHOL
CTD-2541J13.1	BRCA,LUAD,KIRC,LGG,LUSC,PAAD,PCPG,THYM,KICH,MESO,CHOL
CTD-2647L4.4	BRCA,GBM,THCA,BLCA,SARC,LAML,THYM,KICH,ACC,DLBC,CHOL
CYP1B1-AS1	BRCA,HNSC,THCA,PRAD,KIRP,SARC,LAML,PAAD,TGCT,KICH,MESO
CYP4F26P	OV,HNSC,LUSC,STAD,KIRP,SARC,LAML,TGCT,DLBC,UCS,CHOL
DNM3OS	KIRC,PRAD,SKCM,LIHC,KIRP,PAAD,READ,TGCT,THYM,KICH,CHOL
EPB41L4A-AS1	LUAD,KIRC,LGG,SKCM,KIRP,LAML,THYM,KICH,UVM,DLBC,CHOL
FAM95C	THCA,LUSC,BLCA,CESC,SARC,READ,ACC,MESO,DLBC,UCS,CHOL
GATA2-AS1	GBM,KIRC,LGG,THCA,LUSC,BLCA,LAML,ESCA,TGCT,THYM,UCS
HNRNPU-AS1	GBM,LUAD,UCEC,SKCM,COAD,SARC,PAAD,READ,TGCT,MESO,UCS
HOTAIRM1	BRCA,GBM,LUAD,LGG,SARC,LAML,ESCA,TGCT,KICH,UVM,CHOL
LINC00342	GBM,HNSC,LGG,BLCA,PAAD,PCPG,TGCT,UVM,DLBC,UCS,CHOL
LINC00402	BRCA,LUAD,THCA,SKCM,STAD,LAML,PAAD,THYM,MESO,DLBC,CHOL
LRRC75A-AS1	GBM,KIRC,LUSC,PRAD,SKCM,COAD,LAML,READ,TGCT,UVM,CHOL
MAPKAPK5-AS1	GBM,OV,LUAD,LGG,THCA,KIRP,LAML,THYM,KICH,UVM,CHOL
MEF2C-AS1	BRCA,LUAD,LUSC,PRAD,STAD,SARC,LAML,READ,KICH,UVM,CHOL
MIR143HG	BRCA,THCA,LUSC,PRAD,KIRP,PAAD,PCPG,TGCT,KICH,MESO,CHOL
MIR4435-1HG	GBM,KIRC,LGG,BLCA,PAAD,TGCT,MESO,UVM,DLBC,UCS,CHOL
MRGPRF-AS1	KIRC,LGG,PRAD,KIRP,LAML,READ,TGCT,THYM,KICH,UCS,CHOL
NKX2-1-AS1	HNSC,PRAD,COAD,BLCA,CESC,SARC,ESCA,TGCT,THYM,MESO,UCS
RP1-59D14.5	BRCA,GBM,PRAD,SKCM,BLCA,SARC,ESCA,THYM,KICH,UVM,CHOL
RP11-1070N10.3	LUAD,HNSC,LUSC,COAD,STAD,BLCA,CESC,PAAD,TGCT,MESO,CHOL
RP11-1094H24.4	GBM,LUAD,THCA,PRAD,SKCM,BLCA,PAAD,TGCT,THYM,KICH,ACC
RP11-116O18.1	BRCA,KIRC,LGG,THCA,LUSC,PRAD,KIRP,TGCT,THYM,KICH,MESO
RP11-123K19.1	THCA,LUSC,SKCM,CESC,KIRP,ESCA,TGCT,KICH,ACC,UCS,CHOL
RP11-13P5.2	LUAD,THCA,SKCM,SARC,PAAD,ESCA,THYM,ACC,MESO,DLBC,UCS
RP11-164J13.1	BRCA,GBM,LUAD,THCA,LUSC,LAML,ESCA,PCPG,TGCT,KICH,CHOL
RP11-16E12.2	LUAD,HNSC,LUSC,SKCM,BLCA,CESC,ESCA,TGCT,THYM,MESO,UVM
RP11-20I20.4	LUAD,PRAD,KIRP,LAML,ESCA,KICH,ACC,MESO,UVM,UCS,CHOL
RP11-214O1.2	BRCA,PRAD,SKCM,BLCA,CESC,KIRP,LAML,THYM,ACC,MESO,DLBC
RP11-216L13.19	LUAD,KIRC,THCA,COAD,BLCA,LIHC,PAAD,READ,THYM,MESO,CHOL
RP11-247C2.2	BRCA,LUAD,THCA,PRAD,SKCM,CESC,PAAD,ESCA,READ,TGCT,THYM
RP11-276H19.1	BRCA,LUAD,KIRC,LUSC,PRAD,KIRP,READ,TGCT,THYM,UVM,CHOL
RP11-326C3.2	UCEC,HNSC,THCA,SKCM,LAML,ESCA,READ,KICH,MESO,UVM,DLBC
RP11-356I2.4	BRCA,SKCM,BLCA,PAAD,TGCT,THYM,KICH,ACC,MESO,DLBC,CHOL
RP11-384L8.1	BRCA,LUAD,THCA,LUSC,BLCA,CESC,LAML,TGCT,KICH,MESO,CHOL
RP11-390F4.6	GBM,OV,LUAD,HNSC,LGG,THCA,LUSC,PRAD,ESCA,TGCT,KICH
RP11-395B7.4	KIRC,LUSC,SKCM,SARC,LAML,ESCA,TGCT,THYM,KICH,ACC,UCS
RP11-438B23.2	KIRC,THCA,LUSC,PRAD,SKCM,SARC,PAAD,TGCT,ACC,MESO,UVM
RP11-465L10.10	THCA,PRAD,SKCM,CESC,KIRP,SARC,ESCA,TGCT,ACC,DLBC,UCS
RP11-469H8.6	GBM,OV,KIRC,THCA,KIRP,TGCT,THYM,KICH,MESO,UCS,CHOL
RP11-46D6.1	OV,LUAD,LUSC,STAD,BLCA,LAML,ESCA,TGCT,THYM,DLBC,CHOL
RP11-531A24.3	LUAD,UCEC,HNSC,LUSC,BLCA,KIRP,TGCT,THYM,KICH,MESO,UVM
RP11-538D16.2	GBM,THCA,SKCM,KIRP,LAML,ESCA,TGCT,THYM,MESO,UCS,CHOL
RP11-598F7.5	GBM,LUAD,KIRC,THCA,PCPG,READ,TGCT,KICH,ACC,MESO,UVM
RP11-613D13.8	BRCA,LUAD,LUSC,PRAD,LIHC,KIRP,PAAD,ESCA,PCPG,KICH,MESO
RP11-616M22.12	PRAD,KIRP,SARC,LAML,ESCA,READ,TGCT,KICH,ACC,MESO,CHOL
RP11-713C5.1	THCA,PRAD,SKCM,KIRP,LAML,PAAD,TGCT,THYM,KICH,MESO,DLBC
RP11-802E16.3	GBM,OV,LUSC,LAML,ESCA,TGCT,THYM,KICH,ACC,UCS,CHOL
RP11-817I4.1	BRCA,THCA,PRAD,SKCM,STAD,BLCA,LIHC,CESC,KIRP,THYM,CHOL
RP11-834C11.4	GBM,OV,LGG,READ,TGCT,THYM,KICH,UVM,DLBC,UCS,CHOL
RP11-876N24.4	GBM,OV,LUAD,HNSC,THCA,BLCA,CESC,SARC,LAML,PAAD,CHOL
RP11-890B15.3	GBM,PRAD,STAD,SARC,ESCA,TGCT,THYM,KICH,MESO,DLBC,CHOL
RP11-894P9.1	GBM,THCA,LIHC,CESC,SARC,PAAD,PCPG,THYM,UVM,UCS,CHOL
RP11-960L18.1	GBM,LUAD,LGG,THCA,LUSC,SKCM,STAD,SARC,ESCA,TGCT,KICH
RP4-724E16.2	OV,LUAD,THCA,LUSC,BLCA,SARC,PAAD,THYM,ACC,UVM,CHOL
RP5-1039K5.19	LUSC,PRAD,BLCA,LAML,PAAD,ESCA,THYM,KICH,ACC,MESO,CHOL
RP5-1059L7.1	OV,LUSC,SKCM,STAD,BLCA,CESC,SARC,PAAD,TGCT,THYM,DLBC
RP5-858L17.1	BRCA,UCEC,KIRC,LUSC,PRAD,BLCA,SARC,ESCA,READ,KICH,CHOL
TMEM220-AS1	BRCA,LUAD,LGG,LUSC,STAD,LIHC,CESC,LAML,READ,THYM,CHOL
AC016738.4	BRCA,GBM,OV,STAD,BLCA,CESC,TGCT,THYM,KICH,ACC
AC092171.4	GBM,OV,LUSC,PRAD,LAML,TGCT,THYM,KICH,UVM,CHOL
AC092667.2	BRCA,LUAD,KIRC,KIRP,SARC,LAML,ESCA,ACC,UCS,CHOL
AC093495.4	THCA,SKCM,KIRP,LAML,PAAD,ESCA,TGCT,THYM,UVM,CHOL
ADAMTS19-AS1	OV,UCEC,STAD,BLCA,CESC,KIRP,SARC,TGCT,KICH,ACC
AF127936.5	GBM,KIRC,LGG,SKCM,BLCA,SARC,PAAD,THYM,UVM,CHOL
AP000476.1	LUAD,KIRC,LUSC,SKCM,STAD,BLCA,PAAD,TGCT,KICH,CHOL
AP000696.2	BRCA,GBM,KIRC,LGG,KIRP,PAAD,TGCT,KICH,MESO,CHOL
AP002954.3	BRCA,GBM,LUSC,LAML,PAAD,ESCA,THYM,KICH,UVM,DLBC
B3GALT5-AS1	GBM,HNSC,LUSC,PRAD,BLCA,SARC,PAAD,READ,KICH,UVM
CDKN2B-AS1	OV,KIRC,THCA,LUSC,BLCA,SARC,LAML,PAAD,READ,CHOL
CTB-131K11.1	UCEC,KIRC,LGG,THCA,SKCM,SARC,PCPG,READ,KICH,MESO
FUT8-AS1	BRCA,OV,HNSC,LUSC,BLCA,KIRP,PCPG,THYM,KICH,ACC
HOTAIR	GBM,OV,LUAD,LGG,LUSC,SARC,PAAD,TGCT,KICH,ACC
HOXA-AS2	BRCA,LUAD,LGG,THCA,KIRP,SARC,TGCT,THYM,KICH,MESO
HOXA10-AS	BRCA,GBM,OV,LUSC,BLCA,CESC,SARC,TGCT,THYM,KICH
HOXC-AS1	LUAD,LGG,LUSC,BLCA,CESC,ESCA,TGCT,KICH,ACC,CHOL
KCNJ2-AS1	BRCA,THCA,LUSC,SARC,LAML,ESCA,TGCT,KICH,MESO,CHOL
LA16c-390H2.4	LUAD,KIRC,LUSC,STAD,CESC,LAML,PAAD,ESCA,TGCT,CHOL
LINC00278	GBM,LGG,LUSC,KIRP,SARC,THYM,KICH,MESO,DLBC,CHOL
LINC00528	BRCA,KIRC,THCA,SKCM,SARC,PAAD,TGCT,THYM,MESO,UVM
LINC00702	GBM,LUAD,KIRC,LUSC,LIHC,KIRP,PAAD,PCPG,READ,KICH
LINC00987	BRCA,LUAD,KIRC,PRAD,KIRP,LAML,PAAD,READ,KICH,CHOL
LINC01480	LGG,THCA,LUSC,BLCA,SARC,PAAD,TGCT,THYM,KICH,CHOL
N4BP2L2-IT2	BRCA,GBM,THCA,LUSC,SKCM,COAD,SARC,MESO,UVM,CHOL
NCBP2-AS2	UCEC,HNSC,LUSC,CESC,LAML,THYM,KICH,MESO,UVM,UCS
NNT-AS1	HNSC,THCA,LUSC,BLCA,SARC,ESCA,TGCT,KICH,MESO,UVM
NPTN-IT1	THCA,BLCA,CESC,SARC,PAAD,TGCT,KICH,UVM,DLBC,CHOL
PTPRG-AS1	BRCA,OV,LUAD,UCEC,STAD,SARC,THYM,MESO,UVM,CHOL
RP1-239B22.5	OV,LGG,LUSC,SKCM,LAML,TGCT,THYM,KICH,DLBC,CHOL
RP11-107N15.1	UCEC,HNSC,LGG,LUSC,PRAD,CESC,ESCA,TGCT,THYM,CHOL
RP11-1299A16.3	UCEC,KIRC,SKCM,CESC,KIRP,LAML,READ,KICH,DLBC,CHOL
RP11-12M5.3	OV,KIRC,LUSC,PAAD,ESCA,PCPG,TGCT,KICH,DLBC,UCS
RP11-148O21.4	LUAD,LGG,LUSC,STAD,LAML,PAAD,ESCA,PCPG,TGCT,MESO
RP11-164P12.4	OV,LUSC,SKCM,SARC,ESCA,TGCT,THYM,KICH,MESO,CHOL
RP11-166D19.1	BRCA,THCA,PRAD,KIRP,LAML,PAAD,READ,TGCT,THYM,CHOL
RP11-18H21.1	BRCA,THCA,LUSC,SKCM,SARC,LAML,PAAD,TGCT,THYM,CHOL
RP11-223I10.1	BRCA,GBM,KIRC,LGG,PRAD,KIRP,PAAD,TGCT,KICH,CHOL
RP11-245P10.4	OV,LUAD,UCEC,LGG,LUSC,CESC,ESCA,TGCT,UCS,CHOL
RP11-266K4.9	BRCA,LUAD,HNSC,THCA,LUSC,BLCA,TGCT,KICH,UVM,CHOL
RP11-303E16.2	LGG,THCA,LUSC,BLCA,CESC,SARC,LAML,ESCA,THYM,KICH
RP11-309L24.4	OV,THCA,LUSC,BLCA,KIRP,TGCT,MESO,DLBC,UCS,CHOL
RP11-325F22.2	THCA,LUSC,SKCM,BLCA,LIHC,PAAD,TGCT,MESO,UVM,CHOL
RP11-428G5.5	BRCA,LUAD,LUSC,SKCM,STAD,PAAD,ESCA,TGCT,THYM,CHOL
RP11-431J24.2	BRCA,GBM,UCEC,LGG,PRAD,SKCM,COAD,SARC,READ,TGCT
RP11-44K6.2	OV,LUAD,UCEC,HNSC,LUSC,STAD,BLCA,CESC,ESCA,DLBC
RP11-452C13.1	GBM,LGG,LUSC,SKCM,KIRP,SARC,TGCT,MESO,UVM,UCS
RP11-473M20.5	HNSC,THCA,COAD,BLCA,CESC,LAML,TGCT,THYM,KICH,CHOL
RP11-473M20.9	LUSC,SKCM,SARC,PCPG,KICH,ACC,MESO,UVM,DLBC,CHOL
RP11-497E19.1	BRCA,GBM,THCA,PRAD,PAAD,TGCT,THYM,KICH,ACC,MESO
RP11-553A21.3	GBM,LGG,THCA,SKCM,BLCA,LAML,TGCT,KICH,MESO,CHOL
RP11-589N15.2	OV,LUSC,SKCM,SARC,ESCA,KICH,UVM,DLBC,UCS,CHOL
RP11-598F7.6	GBM,KIRC,THCA,PCPG,TGCT,THYM,KICH,ACC,MESO,DLBC
RP11-615I2.2	BRCA,THCA,PRAD,BLCA,KIRP,SARC,TGCT,THYM,KICH,UVM
RP11-650L12.2	GBM,LUAD,KIRC,LUSC,SKCM,CESC,SARC,TGCT,THYM,ACC
RP11-710C12.1	LUSC,PRAD,SKCM,LIHC,KIRP,SARC,PAAD,TGCT,THYM,CHOL
RP11-733O18.1	GBM,OV,KIRC,LGG,SARC,TGCT,ACC,UVM,UCS,CHOL
RP11-799B12.4	BRCA,LUAD,LGG,LUSC,BLCA,LIHC,SARC,LAML,TGCT,KICH
RP11-823E8.3	BRCA,LUAD,LUSC,SKCM,KIRP,LAML,ESCA,TGCT,THYM,CHOL
RP11-977G19.5	KIRC,THCA,PCPG,TGCT,THYM,ACC,MESO,UVM,UCS,CHOL
RP13-1032I1.7	BRCA,THCA,BLCA,LAML,PAAD,ESCA,TGCT,KICH,DLBC,CHOL
RP13-225O21.2	KIRC,LUSC,BLCA,LIHC,CESC,KIRP,LAML,THYM,KICH,CHOL
RP3-416H24.1	BRCA,KIRC,LUSC,PRAD,STAD,CESC,TGCT,THYM,KICH,ACC
RP4-728D4.2	KIRC,LGG,LUSC,SKCM,KIRP,SARC,LAML,TGCT,THYM,CHOL
SATB2-AS1	GBM,LUAD,LUSC,SKCM,COAD,BLCA,CESC,SARC,TGCT,KICH
SERTAD4-AS1	GBM,PRAD,SARC,READ,TGCT,ACC,UVM,DLBC,UCS,CHOL
SNHG8	PRAD,CESC,PAAD,TGCT,THYM,KICH,UVM,DLBC,UCS,CHOL
THRB-AS1	KIRC,SKCM,STAD,BLCA,CESC,SARC,TGCT,THYM,KICH,CHOL
TMPO-AS1	GBM,LGG,PRAD,LIHC,LAML,PCPG,THYM,KICH,ACC,UVM
TRBV11-2	BRCA,THCA,SKCM,STAD,PAAD,TGCT,THYM,MESO,DLBC,CHOL
WDR86-AS1	BRCA,LGG,THCA,SARC,LAML,THYM,KICH,MESO,UVM,DLBC
XIST	SKCM,BLCA,LIHC,SARC,PAAD,PCPG,TGCT,THYM,KICH,DLBC
AC002398.12	BRCA,OV,LGG,PRAD,ESCA,PCPG,TGCT,ACC,UVM
AC004447.2	GBM,LUSC,LAML,PAAD,TGCT,KICH,DLBC,UCS,CHOL
AC007405.6	GBM,LUAD,THCA,SKCM,COAD,SARC,ESCA,TGCT,ACC
AC009120.5	GBM,THCA,SARC,TGCT,THYM,KICH,UVM,DLBC,UCS
AC009133.17	LUAD,KIRC,THCA,PRAD,SKCM,STAD,TGCT,THYM,CHOL
AC015849.19	GBM,THCA,SARC,READ,TGCT,THYM,UVM,UCS,CHOL
AC018766.4	LUSC,PRAD,SKCM,LIHC,SARC,LAML,PCPG,UVM,CHOL
APCDD1L-AS1	BRCA,GBM,UCEC,KIRC,KIRP,PAAD,TGCT,THYM,KICH
ARHGEF26-AS1	HNSC,LGG,SARC,THYM,KICH,MESO,UVM,UCS,CHOL
C9orf139	LUAD,HNSC,LGG,LUSC,SKCM,BLCA,TGCT,THYM,CHOL
CARD8-AS1	GBM,KIRC,LGG,LUSC,SARC,PAAD,TGCT,MESO,CHOL
CCDC13-AS1	BRCA,OV,LUAD,KIRC,THCA,BLCA,PCPG,KICH,UCS
CTB-39G8.3	GBM,LGG,THCA,BLCA,KIRP,LAML,PAAD,THYM,CHOL
CTC-378H22.1	GBM,LGG,THCA,KIRP,SARC,LAML,THYM,ACC,CHOL
CTC-429P9.2	SARC,PCPG,TGCT,THYM,KICH,ACC,MESO,UVM,CHOL
CTC-524C5.2	THCA,LUSC,BLCA,ESCA,THYM,ACC,MESO,UVM,CHOL
CTD-2083E4.7	OV,LUAD,KIRC,LUSC,KIRP,THYM,KICH,UVM,DLBC
CTD-2201I18.1	BRCA,LGG,THCA,PRAD,SARC,PAAD,TGCT,THYM,DLBC
CTD-2228K2.7	GBM,LGG,LUSC,LIHC,SARC,ACC,UVM,UCS,CHOL
CTD-2269F5.1	KIRC,HNSC,THCA,SARC,TGCT,THYM,KICH,ACC,DLBC
CTD-2314G24.2	BRCA,THCA,PRAD,SKCM,READ,TGCT,THYM,ACC,MESO
CTD-2368P22.1	OV,HNSC,LUSC,STAD,KIRP,TGCT,THYM,UCS,CHOL
CTD-2510F5.4	GBM,LUAD,KIRC,LGG,SKCM,CESC,LAML,MESO,UCS
CTD-2537I9.12	THCA,LUSC,COAD,SARC,PAAD,PCPG,KICH,ACC,CHOL
CTD-2547L24.3	THCA,SKCM,LIHC,CESC,LAML,TGCT,THYM,UVM,CHOL
CTD-3247F14.2	BRCA,KIRC,THCA,PRAD,SKCM,STAD,LAML,ESCA,PCPG
FAM83A-AS1	LUAD,THCA,LIHC,LAML,ESCA,ACC,MESO,UCS,CHOL
GAS6-AS2	LUAD,LUSC,PRAD,SKCM,CESC,KIRP,THYM,KICH,UCS
HOXB-AS4	HNSC,LUSC,COAD,BLCA,CESC,ESCA,TGCT,ACC,CHOL
IFNG-AS1	BRCA,THCA,SKCM,STAD,LAML,PAAD,ESCA,MESO,CHOL
ITGA9-AS1	OV,KIRC,SKCM,SARC,PAAD,TGCT,THYM,KICH,MESO
KB-1208A12.3	BRCA,GBM,OV,PRAD,ESCA,TGCT,THYM,KICH,CHOL
KBTBD11-OT1	LGG,PRAD,SKCM,BLCA,SARC,PAAD,KICH,ACC,DLBC
LA16c-358B7.3	GBM,THCA,PRAD,BLCA,SARC,PAAD,PCPG,KICH,UVM
LINC00924	BRCA,LIHC,KIRP,PCPG,READ,KICH,ACC,MESO,CHOL
LINC00961	BRCA,GBM,LUAD,KIRC,KIRP,TGCT,KICH,DLBC,CHOL
LINC01150	GBM,OV,KIRC,LGG,THCA,LUSC,KIRP,SARC,PAAD
LINC01550	THCA,PRAD,SKCM,LAML,READ,THYM,KICH,MESO,DLBC
LL0XNC01-237H1.2	KIRC,SARC,LAML,PAAD,TGCT,THYM,UVM,UCS,CHOL
MCM3AP-AS1	GBM,LGG,PRAD,SARC,PAAD,THYM,UVM,UCS,CHOL
MKRN3-AS1	OV,LUAD,LGG,LUSC,SKCM,STAD,SARC,ESCA,TGCT
MNX1-AS2	BRCA,GBM,LUAD,LUSC,PRAD,BLCA,ESCA,TGCT,CHOL
PROX1-AS1	BRCA,KIRC,STAD,CESC,SARC,TGCT,THYM,KICH,ACC
PWAR6	GBM,OV,HNSC,LUSC,BLCA,LIHC,SARC,LAML,ACC
RFPL1S	GBM,OV,HNSC,THCA,PRAD,SKCM,KIRP,LAML,ACC
RP1-151F17.2	OV,PRAD,BLCA,LAML,THYM,KICH,ACC,DLBC,CHOL
RP1-170O19.14	GBM,LGG,SKCM,LIHC,SARC,LAML,TGCT,ACC,MESO
RP11-134L10.1	OV,KIRC,SKCM,KIRP,SARC,LAML,ACC,MESO,CHOL
RP11-141M3.6	OV,UCEC,KIRC,HNSC,LUSC,ESCA,THYM,KICH,CHOL
RP11-159G9.5	LUSC,SARC,LAML,ESCA,PCPG,KICH,UVM,UCS,CHOL
RP11-20J15.3	LUAD,KIRC,THCA,LIHC,KIRP,SARC,THYM,KICH,UCS
RP11-211G23.2	BRCA,UCEC,KIRC,THCA,SKCM,BLCA,SARC,READ,MESO
RP11-21L23.2	LUSC,SKCM,LAML,PAAD,PCPG,THYM,KICH,MESO,CHOL
RP11-253E3.3	GBM,LGG,THCA,BLCA,PCPG,TGCT,THYM,KICH,UVM
RP11-261N11.8	KIRC,LGG,THCA,TGCT,KICH,ACC,UVM,UCS,CHOL
RP11-274B21.14	GBM,BLCA,SARC,PAAD,PCPG,THYM,UVM,UCS,CHOL
RP11-286H14.8	LUSC,BLCA,CESC,SARC,LAML,ESCA,TGCT,THYM,UVM
RP11-314B1.2	LUAD,THCA,LUSC,BLCA,CESC,PAAD,ESCA,ACC,DLBC
RP11-317J10.2	BRCA,GBM,HNSC,LUSC,BLCA,ESCA,TGCT,KICH,CHOL
RP11-324I22.3	GBM,SKCM,BLCA,CESC,SARC,PCPG,KICH,MESO,CHOL
RP11-344B5.2	GBM,LGG,PRAD,SARC,READ,THYM,KICH,MESO,DLBC
RP11-346C4.3	LUAD,LGG,THCA,PRAD,STAD,KIRP,KICH,ACC,MESO
RP11-35J10.6	BRCA,LUAD,KIRC,LUSC,KIRP,TGCT,THYM,KICH,MESO
RP11-35J10.7	BRCA,OV,LUAD,KIRC,LUSC,KIRP,THYM,KICH,MESO
RP11-439E19.10	SKCM,BLCA,CESC,ESCA,TGCT,THYM,KICH,UVM,CHOL
RP11-445F12.1	OV,KIRC,HNSC,LUSC,BLCA,KIRP,TGCT,UVM,CHOL
RP11-44K6.4	OV,LUAD,UCEC,LUSC,STAD,BLCA,CESC,ESCA,DLBC
RP11-459I19.1	LUAD,LGG,PRAD,LAML,TGCT,THYM,ACC,DLBC,CHOL
RP11-498E2.9	GBM,KIRC,CESC,SARC,LAML,PCPG,KICH,DLBC,UCS
RP11-4O1.2	THCA,LUSC,SKCM,SARC,LAML,TGCT,THYM,UVM,CHOL
RP11-510N19.5	HNSC,THCA,LUSC,TGCT,THYM,KICH,MESO,UCS,CHOL
RP11-523H20.3	LUAD,LUSC,KIRP,SARC,ESCA,THYM,ACC,UVM,UCS
RP11-531A24.5	GBM,LUAD,PRAD,SARC,TGCT,THYM,KICH,ACC,MESO
RP11-532F12.5	THCA,SKCM,LAML,PAAD,PCPG,KICH,ACC,UVM,CHOL
RP11-549B18.1	GBM,LUAD,LGG,LUSC,CESC,SARC,ESCA,KICH,MESO
RP11-552F3.9	GBM,OV,LGG,SKCM,BLCA,LAML,KICH,UCS,CHOL
RP11-57A19.2	BRCA,UCEC,PRAD,BLCA,SARC,ESCA,TGCT,THYM,CHOL
RP11-664D7.4	BRCA,OV,LUAD,KIRC,LGG,KIRP,THYM,KICH,ACC
RP11-677M24.1	OV,THCA,BLCA,LAML,PAAD,TGCT,THYM,ACC,CHOL
RP11-67C2.2	GBM,THCA,LUSC,STAD,CESC,LAML,ESCA,READ,THYM
RP11-680C21.1	KIRC,HNSC,THCA,LUSC,KIRP,TGCT,KICH,MESO,CHOL
RP11-68I18.10	GBM,OV,LGG,LUSC,LIHC,SARC,TGCT,KICH,CHOL
RP11-728F11.4	GBM,LGG,LUSC,LAML,PAAD,PCPG,KICH,ACC,CHOL
RP11-760H22.2	BRCA,THCA,LUSC,PRAD,BLCA,PAAD,THYM,ACC,CHOL
RP11-768F21.1	KIRC,THCA,SKCM,BLCA,LIHC,SARC,PCPG,TGCT,KICH
RP11-817I4.2	OV,UCEC,PRAD,CESC,KIRP,ESCA,TGCT,UVM,CHOL
RP11-849I19.1	GBM,KIRC,LUSC,PRAD,KIRP,SARC,ESCA,TGCT,UCS
RP11-88H9.2	LUAD,HNSC,LUSC,ESCA,KICH,ACC,MESO,UVM,DLBC
RP11-956J14.1	BRCA,BLCA,CESC,ESCA,TGCT,THYM,KICH,ACC,MESO
RP11-968O1.5	KIRC,THCA,PRAD,SKCM,LAML,PAAD,THYM,KICH,UCS
RP3-368A4.5	GBM,LGG,THCA,SKCM,COAD,TGCT,THYM,UVM,DLBC
RP4-742C19.13	LUAD,LGG,THCA,PRAD,LAML,ESCA,THYM,UVM,DLBC
RP5-1142A6.9	GBM,PRAD,STAD,ESCA,PCPG,TGCT,THYM,KICH,UVM
RP6-65G23.3	KIRC,HNSC,SARC,ESCA,TGCT,THYM,ACC,UVM,CHOL
SH3BP5-AS1	GBM,HNSC,LGG,THCA,LAML,PAAD,TGCT,THYM,UVM
SLC16A1-AS1	BRCA,UCEC,KIRC,LGG,BLCA,KIRP,LAML,THYM,UVM
SNHG14	OV,LUAD,LUSC,SKCM,BLCA,LAML,TGCT,THYM,ACC
SNHG7	CESC,SARC,LAML,TGCT,KICH,UVM,DLBC,UCS,CHOL
TBX5-AS1	LUAD,LGG,THCA,LUSC,PRAD,SKCM,TGCT,DLBC,UCS
TFAP2A-AS1	OV,LUAD,SKCM,ESCA,PCPG,READ,THYM,UCS,CHOL
TSPEAR-AS1	OV,THCA,LUSC,BLCA,TGCT,ACC,MESO,UVM,CHOL
TTTY15	THCA,PRAD,KIRP,SARC,PAAD,TGCT,ACC,UVM,DLBC
VIPR1-AS1	BRCA,LUAD,COAD,BLCA,CESC,LAML,PAAD,TGCT,CHOL
ZEB2-AS1	LUAD,LUSC,BLCA,CESC,LAML,PAAD,ESCA,TGCT,CHOL
ZFY-AS1	GBM,LGG,THCA,SKCM,SARC,PCPG,KICH,DLBC,CHOL
ZNF503-AS2	BRCA,STAD,PAAD,READ,TGCT,THYM,KICH,DLBC,UCS
AC002398.13	BRCA,LGG,THCA,TGCT,THYM,UVM,UCS,CHOL
AC006042.6	BRCA,LUSC,SKCM,BLCA,MESO,UVM,DLBC,CHOL
AC007193.10	GBM,OV,LUAD,LGG,LUSC,SARC,ESCA,UCS
AC007392.3	GBM,PRAD,CESC,SARC,PCPG,TGCT,THYM,KICH
AC007405.8	LUAD,KIRC,LUSC,BLCA,KIRP,LAML,TGCT,CHOL
AC012123.1	OV,KIRC,THCA,PRAD,TGCT,THYM,ACC,UCS
AC016747.3	UCEC,KIRC,LUSC,CESC,LAML,READ,UVM,UCS
AC061961.2	PRAD,COAD,SARC,PCPG,READ,TGCT,KICH,CHOL
AC073046.25	OV,LGG,THCA,LUSC,PAAD,TGCT,MESO,CHOL
AC104667.3	LUSC,PRAD,SKCM,TGCT,THYM,ACC,UCS,CHOL
AC104809.2	OV,UCEC,LUSC,SARC,LAML,ACC,UVM,CHOL
AC108142.1	BRCA,GBM,LUSC,SKCM,TGCT,THYM,UVM,DLBC
ADAMTS9-AS2	BRCA,THCA,SARC,ESCA,READ,TGCT,THYM,KICH
AF131215.8	BRCA,OV,STAD,CESC,KIRP,ESCA,DLBC,UCS
ANKRD10-IT1	LUSC,PRAD,COAD,LIHC,SARC,TGCT,THYM,UVM
CALML3-AS1	LUSC,BLCA,KIRP,TGCT,THYM,KICH,MESO,CHOL
CAPN10-AS1	GBM,LGG,THCA,KIRP,PAAD,KICH,UVM,CHOL
CHL1-AS1	GBM,LUAD,LGG,LUSC,LAML,ESCA,KICH,UVM
CTB-113D17.1	LGG,SKCM,CESC,SARC,LAML,TGCT,THYM,KICH
CTB-31O20.4	GBM,THCA,SARC,LAML,TGCT,THYM,UVM,UCS
CTB-89H12.4	SKCM,COAD,CESC,KIRP,READ,THYM,ACC,UVM
CTC-429P9.5	BLCA,SARC,PCPG,TGCT,THYM,KICH,ACC,UVM
CTC-479C5.10	BRCA,GBM,THCA,COAD,LAML,PAAD,THYM,UCS
CTC-550B14.7	GBM,OV,THCA,LAML,TGCT,THYM,KICH,CHOL
CTD-2002H8.2	GBM,THCA,SKCM,SARC,TGCT,THYM,UVM,CHOL
CTD-2132N18.2	SARC,TGCT,THYM,KICH,ACC,UVM,UCS,CHOL
CTD-2291D10.4	SKCM,SARC,LAML,READ,TGCT,THYM,KICH,UCS
CTD-2298J14.2	BRCA,KIRC,LGG,PRAD,SKCM,SARC,TGCT,KICH
CTD-2396E7.11	THCA,PRAD,PAAD,TGCT,UVM,DLBC,UCS,CHOL
CTD-2515H24.2	LUAD,UCEC,KIRC,LUSC,KIRP,SARC,THYM,MESO
CTD-2517M22.14	GBM,LGG,LUSC,PRAD,SKCM,BLCA,PAAD,THYM
EBLN3	GBM,KIRC,LGG,TGCT,KICH,UVM,UCS,CHOL
FLNB-AS1	BRCA,THCA,SARC,LAML,TGCT,THYM,KICH,CHOL
FOXCUT	KIRC,LUSC,KIRP,LAML,TGCT,THYM,KICH,CHOL
GS1-358P8.4	KIRC,THCA,PRAD,SARC,ESCA,TGCT,KICH,CHOL
HOXC13-AS	GBM,LUAD,STAD,SARC,ESCA,TGCT,THYM,ACC
KB-318B8.7	LGG,BLCA,SARC,PAAD,THYM,ACC,UVM,CHOL
LINC01127	HNSC,THCA,STAD,LAML,THYM,KICH,DLBC,CHOL
LINC01336	LUAD,KIRC,LUSC,SKCM,BLCA,LAML,THYM,MESO
MEOX2-AS1	BRCA,KIRC,SARC,TGCT,THYM,KICH,MESO,UCS
NEBL-AS1	GBM,OV,STAD,KIRP,TGCT,THYM,KICH,CHOL
PWRN1	OV,KIRC,PCPG,TGCT,THYM,KICH,UCS,CHOL
RAMP2-AS1	KIRC,THCA,PAAD,TGCT,THYM,MESO,UVM,CHOL
RASSF8-AS1	LUAD,LUSC,READ,TGCT,THYM,ACC,MESO,UCS
RGMB-AS1	LGG,SKCM,SARC,ESCA,THYM,KICH,DLBC,UCS
RP11-172H24.4	GBM,OV,SKCM,SARC,LAML,PCPG,TGCT,ACC
RP11-186B7.4	ESCA,PCPG,TGCT,THYM,KICH,ACC,MESO,UCS
RP11-193M21.1	OV,BLCA,ESCA,TGCT,THYM,KICH,ACC,MESO
RP11-1C8.4	BRCA,GBM,LGG,LUSC,KIRP,TGCT,KICH,CHOL
RP11-283G6.3	LUAD,COAD,BLCA,ESCA,READ,THYM,UCS,CHOL
RP11-288L9.1	BRCA,GBM,UCEC,HNSC,PCPG,TGCT,THYM,MESO
RP11-295G20.2	LUAD,THCA,PRAD,LAML,TGCT,THYM,KICH,UVM
RP11-298J20.4	UCEC,SKCM,BLCA,SARC,ESCA,THYM,ACC,CHOL
RP11-2N1.2	LUAD,KIRC,LUSC,PRAD,BLCA,KIRP,TGCT,CHOL
RP11-301L8.2	THCA,LUSC,COAD,ESCA,TGCT,ACC,DLBC,CHOL
RP11-311F12.1	KIRC,HNSC,LUSC,BLCA,KIRP,ESCA,KICH,CHOL
RP11-320H14.1	BRCA,KIRC,SKCM,KIRP,SARC,PCPG,THYM,MESO
RP11-337C18.9	THCA,SARC,PAAD,THYM,KICH,MESO,UVM,CHOL
RP11-354E11.2	LUAD,HNSC,LUSC,PRAD,COAD,CESC,PAAD,READ
RP11-389G6.3	OV,KIRC,THCA,ESCA,READ,THYM,KICH,MESO
RP11-394O4.5	BRCA,PRAD,KIRP,PAAD,ESCA,TGCT,THYM,KICH
RP11-3P17.5	OV,SARC,PCPG,THYM,UVM,DLBC,UCS,CHOL
RP11-416N2.4	BRCA,OV,LUSC,CESC,SARC,LAML,TGCT,CHOL
RP11-424M24.5	GBM,OV,LGG,THCA,KIRP,PAAD,THYM,KICH
RP11-439C15.4	LGG,SKCM,STAD,BLCA,KICH,ACC,UVM,CHOL
RP11-444D3.1	BRCA,LUAD,THCA,PRAD,TGCT,THYM,DLBC,CHOL
RP11-461O7.1	BRCA,KIRC,THCA,PRAD,SKCM,KICH,MESO,CHOL
RP11-478J18.2	LUAD,THCA,LUSC,PAAD,TGCT,THYM,KICH,CHOL
RP11-47L3.1	SKCM,STAD,PAAD,READ,THYM,KICH,UVM,DLBC
RP11-480A16.1	GBM,LGG,PRAD,COAD,PAAD,THYM,UCS,CHOL
RP11-483P21.2	KIRC,THCA,SKCM,LIHC,LAML,MESO,UVM,CHOL
RP11-48G14.3	STAD,CESC,LAML,THYM,KICH,MESO,DLBC,CHOL
RP11-494M8.4	OV,LUAD,LUSC,PRAD,TGCT,THYM,KICH,MESO
RP11-521B24.5	GBM,THCA,LUSC,KIRP,TGCT,KICH,UVM,CHOL
RP11-568J23.8	UCEC,KIRC,HNSC,LUSC,LAML,PAAD,THYM,DLBC
RP11-572O17.1	LGG,LAML,TGCT,THYM,KICH,UVM,DLBC,CHOL
RP11-582J16.5	GBM,OV,LUAD,THCA,COAD,LAML,UVM,CHOL
RP11-624M8.1	LGG,THCA,PRAD,SKCM,KIRP,SARC,THYM,CHOL
RP11-626G11.1	GBM,LGG,COAD,CESC,ESCA,READ,TGCT,CHOL
RP11-632L2.2	OV,KIRC,LUSC,STAD,KIRP,SARC,TGCT,CHOL
RP11-66B24.4	GBM,THCA,BLCA,LIHC,CESC,PAAD,THYM,KICH
RP11-6O2.3	BRCA,LGG,PRAD,SARC,LAML,UVM,DLBC,CHOL
RP11-701H24.3	GBM,THCA,STAD,LAML,TGCT,THYM,ACC,UVM
RP11-796E2.4	HNSC,THCA,CESC,TGCT,THYM,KICH,UVM,DLBC
RP11-848P1.2	GBM,LGG,SARC,LAML,PCPG,TGCT,THYM,MESO
RP13-616I3.1	KIRC,LGG,LUSC,BLCA,LAML,ESCA,THYM,CHOL
RP3-333A15.2	KIRC,KIRP,LAML,PAAD,ESCA,THYM,ACC,UCS
RP3-368A4.6	GBM,LUAD,UCEC,LGG,COAD,LAML,KICH,UVM
RP4-607I7.1	GBM,LGG,BLCA,LIHC,THYM,KICH,DLBC,CHOL
RP4-639F20.1	BRCA,LUAD,LUSC,PRAD,PAAD,ESCA,TGCT,CHOL
RP4-758J18.10	THCA,STAD,SARC,TGCT,THYM,KICH,MESO,CHOL
RP5-1057J7.7	PRAD,BLCA,CESC,SARC,TGCT,ACC,UVM,CHOL
RP5-1120P11.1	KIRC,LIHC,KIRP,SARC,PCPG,READ,ACC,CHOL
SAMD12-AS1	HNSC,LUSC,PRAD,CESC,PAAD,ESCA,THYM,CHOL
SLC25A21-AS1	LGG,SKCM,SARC,TGCT,THYM,KICH,MESO,UVM
SRD5A3-AS1	BRCA,OV,LUSC,CESC,LAML,ESCA,TGCT,UCS
STARD4-AS1	SKCM,CESC,SARC,LAML,TGCT,MESO,UVM,CHOL
TEX26-AS1	BRCA,GBM,LGG,THCA,SARC,PAAD,KICH,CHOL
TMEM92-AS1	KIRC,THCA,BLCA,LIHC,CESC,LAML,ESCA,TGCT
TSPEAR-AS2	OV,THCA,LUSC,BLCA,SARC,TGCT,ACC,UCS
U62631.5	BRCA,LUAD,THCA,LUSC,LAML,PAAD,ESCA,UCS
UBXN10-AS1	GBM,PRAD,SKCM,SARC,THYM,ACC,UVM,CHOL
WWC2-AS2	THCA,PRAD,CESC,LAML,PCPG,THYM,KICH,CHOL
ZFAS1	GBM,KIRC,THCA,LAML,TGCT,UVM,DLBC,CHOL
A1BG-AS1	GBM,CESC,READ,KICH,ACC,UVM,CHOL
AC000403.4	UCEC,THCA,LUSC,SARC,ESCA,READ,TGCT
AC005281.2	LUAD,KIRC,LUSC,STAD,BLCA,CESC,PAAD
AC005618.6	LUAD,LAML,THYM,KICH,ACC,UCS,CHOL
AC005785.2	OV,LGG,TGCT,KICH,ACC,DLBC,CHOL
AC009120.6	GBM,THCA,PAAD,TGCT,KICH,UVM,CHOL
AC009501.4	HNSC,LUSC,KIRP,TGCT,THYM,UVM,CHOL
AC015971.2	BRCA,THCA,ESCA,TGCT,THYM,UVM,CHOL
AC027601.1	BRCA,THCA,LUSC,PRAD,LAML,THYM,UVM
AC068580.6	BRCA,SKCM,LAML,TGCT,THYM,KICH,DLBC
AC079630.2	LUAD,KIRC,THCA,LUSC,KIRP,KICH,DLBC
AC084219.3	PRAD,KIRP,SARC,ESCA,THYM,ACC,UVM
AC103563.9	KIRC,BLCA,LAML,ESCA,THYM,KICH,DLBC
AC106786.1	HNSC,PRAD,SARC,PAAD,READ,TGCT,THYM
AC114730.3	GBM,THCA,LUSC,COAD,KIRP,LAML,PCPG
ASMTL-AS1	GBM,LGG,COAD,KIRP,LAML,ACC,UVM
BARX1-AS1	LUAD,LUSC,BLCA,CESC,ESCA,ACC,UCS
C15orf56	KIRC,THCA,SKCM,THYM,KICH,ACC,CHOL
C8orf49	OV,STAD,LIHC,SARC,TGCT,ACC,MESO
CCDC144NL-AS1	KIRC,KIRP,ESCA,TGCT,THYM,KICH,CHOL
CEBPA-AS1	LUAD,THCA,BLCA,SARC,THYM,DLBC,CHOL
CFLAR-AS1	LUAD,THCA,LUSC,ESCA,TGCT,THYM,DLBC
CH17-140K24.6	BRCA,GBM,OV,LUAD,LUSC,SARC,TGCT
CTB-41I6.1	GBM,LGG,SKCM,PAAD,TGCT,THYM,DLBC
CTBP1-AS	LUAD,LGG,THCA,PRAD,SARC,PCPG,UCS
CTC-327F10.4	BRCA,GBM,KIRC,PRAD,BLCA,CESC,PAAD
CTC-558O2.2	OV,KIRC,THCA,BLCA,SARC,THYM,MESO
CTC-559E9.5	GBM,LUAD,LUSC,CESC,LAML,KICH,CHOL
CTD-2196E14.6	GBM,LUAD,LUSC,PRAD,TGCT,UVM,CHOL
CTD-2270P14.1	THCA,PRAD,TGCT,THYM,ACC,UVM,DLBC
CTD-2308L22.1	UCEC,HNSC,BLCA,SARC,TGCT,KICH,ACC
CTD-2313F11.1	KIRC,SKCM,LAML,TGCT,THYM,MESO,DLBC
CTD-2334D19.1	KIRC,HNSC,PRAD,STAD,BLCA,SARC,TGCT
CTD-2540F13.2	BRCA,SARC,LAML,KICH,ACC,UCS,CHOL
CTD-2554C21.2	THCA,TGCT,THYM,KICH,UVM,DLBC,CHOL
CTD-2587H19.2	GBM,OV,SKCM,STAD,PAAD,TGCT,CHOL
CTD-3099C6.9	KIRC,LIHC,ESCA,TGCT,KICH,UVM,CHOL
CTD-3157E16.1	THCA,PRAD,TGCT,THYM,MESO,UVM,DLBC
CTD-3214H19.6	KIRC,LUSC,SKCM,BLCA,CESC,LAML,ESCA
ENTPD1-AS1	LGG,THCA,PAAD,TGCT,KICH,ACC,UCS
EPHA5-AS1	GBM,SKCM,SARC,PCPG,THYM,ACC,MESO
EVX1-AS	PRAD,COAD,BLCA,PAAD,TGCT,ACC,CHOL
FAM13A-AS1	GBM,THCA,KIRP,LAML,THYM,UVM,DLBC
FLJ46284	BRCA,STAD,CESC,ESCA,THYM,KICH,CHOL
GATA3-AS1	KIRC,PRAD,BLCA,CESC,KIRP,ESCA,TGCT
GATA6-AS1	LUAD,LUSC,SARC,PCPG,TGCT,THYM,KICH
GS1-124K5.3	CESC,SARC,PCPG,TGCT,THYM,UCS,CHOL
H1FX-AS1	THCA,PAAD,TGCT,KICH,UVM,DLBC,CHOL
HOXB-AS2	BRCA,PRAD,COAD,STAD,LAML,TGCT,DLBC
HOXD-AS2	OV,LGG,LUSC,TGCT,THYM,MESO,UVM
HYMAI	OV,LUSC,SARC,ESCA,TGCT,KICH,ACC
KB-208E9.1	UCEC,SARC,LAML,KICH,ACC,MESO,CHOL
LA16c-390E6.4	GBM,PRAD,LAML,TGCT,THYM,UVM,DLBC
LINC00261	GBM,OV,THCA,PRAD,TGCT,ACC,CHOL
LINC00294	BLCA,CESC,KIRP,LAML,PAAD,TGCT,UVM
LINC00482	PRAD,BLCA,LAML,TGCT,KICH,ACC,CHOL
LINC00641	GBM,READ,TGCT,THYM,KICH,UVM,DLBC
LINC00657	THCA,COAD,PAAD,TGCT,THYM,KICH,UVM
LINC00665	GBM,LGG,PRAD,TGCT,UVM,UCS,CHOL
LINC00877	THCA,LUSC,LAML,TGCT,KICH,DLBC,CHOL
LINC00894	GBM,LUAD,LGG,LUSC,PCPG,THYM,UVM
LINC00926	LUAD,LGG,THCA,LUSC,PAAD,TGCT,THYM
LINC01057	LGG,LAML,TGCT,UVM,DLBC,UCS,CHOL
LINC01089	HNSC,LAML,PAAD,THYM,KICH,UVM,CHOL
LINC01124	HNSC,LUSC,BLCA,SARC,TGCT,UCS,CHOL
LINC01311	KIRC,PRAD,TGCT,THYM,KICH,UVM,CHOL
LL21NC02-21A1.1	PAAD,TGCT,THYM,KICH,ACC,DLBC,CHOL
MCF2L-AS1	KIRC,HNSC,BLCA,CESC,KIRP,TGCT,KICH
MGAT3-AS1	LUAD,KIRC,THCA,LUSC,STAD,LAML,TGCT
MIR205HG	THCA,LUSC,PRAD,SKCM,STAD,PAAD,TGCT
MIR210HG	GBM,PAAD,TGCT,THYM,ACC,UVM,CHOL
MNX1-AS1	BRCA,LUAD,LGG,CESC,TGCT,DLBC,CHOL
NEAT1	GBM,KIRC,PAAD,THYM,KICH,UVM,DLBC
OSMR-AS1	GBM,LGG,STAD,BLCA,THYM,KICH,UCS
PP7080	KIRC,SKCM,STAD,PAAD,KICH,UVM,CHOL
PPP1R26-AS1	LGG,SARC,LAML,ESCA,THYM,ACC,UVM
RAP2C-AS1	LGG,THCA,PRAD,PCPG,TGCT,THYM,UVM
RP1-134E15.3	THCA,BLCA,CESC,LAML,ESCA,TGCT,DLBC
RP1-151F17.1	THCA,PRAD,BLCA,CESC,KICH,DLBC,CHOL
RP1-63M2.7	BRCA,LUAD,PRAD,LIHC,SARC,KICH,UVM
RP1-68D18.4	BRCA,LUSC,LAML,ESCA,KICH,UVM,DLBC
RP11-1102P16.1	BRCA,PRAD,SARC,TGCT,THYM,KICH,UCS
RP11-1109F11.3	LGG,THCA,TGCT,THYM,KICH,UVM,CHOL
RP11-110I1.11	GBM,CESC,SARC,TGCT,THYM,UVM,CHOL
RP11-118K6.3	GBM,LUAD,KIRC,PCPG,TGCT,ACC,CHOL
RP11-1275H24.2	KIRC,LGG,THCA,PRAD,KICH,UVM,CHOL
RP11-142E9.1	UCEC,COAD,LIHC,ESCA,THYM,ACC,UVM
RP11-153F5.7	SARC,LAML,TGCT,THYM,ACC,UCS,CHOL
RP11-157P1.4	THCA,LUSC,SARC,LAML,PAAD,THYM,CHOL
RP11-159N11.4	GBM,LUAD,LGG,SKCM,THYM,ACC,UCS
RP11-206L10.2	LGG,THCA,BLCA,SARC,PCPG,UCS,CHOL
RP11-23P13.6	PRAD,COAD,READ,TGCT,MESO,DLBC,CHOL
RP11-244O19.1	GBM,LUAD,LUSC,BLCA,CESC,LAML,TGCT
RP11-262A16.1	LGG,LUSC,SARC,ESCA,TGCT,THYM,KICH
RP11-264B17.2	GBM,LUSC,SKCM,SARC,PCPG,UVM,UCS
RP11-266L9.8	GBM,KIRC,LGG,SKCM,SARC,READ,DLBC
RP11-284F21.10	STAD,CESC,READ,TGCT,KICH,ACC,CHOL
RP11-284F21.9	LUAD,LAML,ESCA,TGCT,KICH,ACC,CHOL
RP11-290H9.4	GBM,SKCM,LAML,ESCA,KICH,MESO,CHOL
RP11-329L6.2	LGG,PAAD,READ,TGCT,THYM,DLBC,CHOL
RP11-337C18.8	SARC,LAML,THYM,UVM,DLBC,UCS,CHOL
RP11-340F14.6	SARC,LAML,TGCT,MESO,UVM,DLBC,CHOL
RP11-344E13.4	PRAD,CESC,SARC,TGCT,THYM,MESO,UCS
RP11-345N11.1	HNSC,THCA,PRAD,SKCM,STAD,SARC,CHOL
RP11-347I19.8	GBM,LGG,PRAD,TGCT,KICH,MESO,CHOL
RP11-379F4.7	CESC,PAAD,THYM,MESO,UVM,UCS,CHOL
RP11-384K6.6	GBM,THCA,SARC,LAML,THYM,UCS,CHOL
RP11-400F19.18	GBM,LGG,THCA,SARC,LAML,UVM,CHOL
RP11-434I12.2	LUAD,LUSC,CESC,LAML,UVM,UCS,CHOL
RP11-440I14.2	LUAD,LUSC,PRAD,LIHC,LAML,ESCA,CHOL
RP11-443B20.1	GBM,OV,SARC,ESCA,ACC,MESO,CHOL
RP11-44M6.7	GBM,LGG,LUSC,ESCA,ACC,MESO,CHOL
RP11-452F19.3	GBM,READ,TGCT,THYM,KICH,UVM,DLBC
RP11-47I22.1	THCA,LAML,TGCT,THYM,KICH,UVM,DLBC
RP11-489O18.1	GBM,LGG,TGCT,THYM,ACC,UVM,CHOL
RP11-499O7.7	LUAD,LUSC,BLCA,CESC,ESCA,KICH,CHOL
RP11-504P24.8	LGG,THCA,LUSC,PAAD,TGCT,UVM,CHOL
RP11-505K9.1	BRCA,LUAD,THCA,PAAD,THYM,MESO,UVM
RP11-598F7.3	LUAD,LUSC,SKCM,KIRP,TGCT,DLBC,CHOL
RP11-60L3.1	THCA,COAD,BLCA,PAAD,ESCA,TGCT,THYM
RP11-627G18.1	LUAD,LUSC,STAD,SARC,PCPG,TGCT,MESO
RP11-629G13.1	OV,PRAD,SARC,TGCT,KICH,ACC,MESO
RP11-669E14.6	THCA,BLCA,SARC,THYM,UVM,UCS,CHOL
RP11-677M14.7	THCA,KIRP,THYM,ACC,MESO,UVM,UCS
RP11-679B19.1	PRAD,PAAD,READ,TGCT,THYM,MESO,UVM
RP11-713N11.6	GBM,OV,BLCA,LAML,ESCA,THYM,ACC
RP11-736K20.5	BRCA,LUAD,ESCA,TGCT,THYM,UCS,CHOL
RP11-794G24.1	BRCA,LUSC,COAD,STAD,KIRP,ESCA,READ
RP11-80H8.4	GBM,LGG,THCA,PRAD,LAML,THYM,DLBC
RP11-81H14.2	LUAD,HNSC,THCA,LUSC,SKCM,TGCT,DLBC
RP11-843P14.1	THCA,SARC,TGCT,THYM,UVM,UCS,CHOL
RP11-867G23.10	BRCA,PRAD,KIRP,PAAD,READ,TGCT,KICH
RP11-89K21.1	UCEC,BLCA,KIRP,LAML,TGCT,KICH,CHOL
RP11-93H24.3	LGG,PRAD,SKCM,COAD,PAAD,READ,CHOL
RP11-9E17.1	LUAD,KIRC,LUSC,LAML,THYM,KICH,CHOL
RP3-394A18.1	THCA,LAML,TGCT,THYM,UVM,DLBC,CHOL
RP3-439F8.1	GBM,PRAD,BLCA,SARC,THYM,KICH,UVM
RP3-523K23.2	KIRC,LUSC,PRAD,KIRP,TGCT,THYM,MESO
RP4-758J18.2	BRCA,LGG,PRAD,SARC,TGCT,THYM,UVM
RP4-781B1.5	KIRC,SKCM,STAD,SARC,ESCA,KICH,ACC
RUSC1-AS1	BRCA,LGG,LUSC,PRAD,THYM,UVM,CHOL
SAPCD1-AS1	OV,LUAD,KIRC,THCA,LUSC,PAAD,CHOL
SIRPG-AS1	LUAD,SKCM,LAML,ESCA,TGCT,THYM,DLBC
SIX3-AS1	OV,LUSC,BLCA,CESC,KIRP,SARC,LAML
SLCO4A1-AS1	OV,SKCM,KIRP,KICH,UVM,DLBC,CHOL
SNAP25-AS1	KIRC,THCA,PRAD,SKCM,SARC,KICH,MESO
SNHG11	COAD,KIRP,LAML,TGCT,KICH,UVM,UCS
SNHG15	PRAD,COAD,READ,TGCT,THYM,DLBC,CHOL
ST3GAL4-AS1	LUAD,THCA,LAML,PAAD,THYM,KICH,UVM
TM4SF1-AS1	OV,THCA,LUSC,CESC,PAAD,KICH,CHOL
TMEM51-AS1	THCA,LUSC,PRAD,LAML,TGCT,THYM,CHOL
TTTY10	LUSC,STAD,KIRP,PAAD,ACC,UVM,DLBC
XXbac-BPG299F13.14	OV,KIRC,LUSC,LAML,THYM,MESO,UVM
XXbac-BPGBPG55C20.2	LGG,THCA,SKCM,LAML,TGCT,THYM,UVM
ZNF638-IT1	THCA,COAD,LAML,THYM,MESO,UVM,CHOL
ZNF793-AS1	LAML,PAAD,ESCA,READ,TGCT,UCS,CHOL
ZSCAN16-AS1	GBM,KIRP,TGCT,THYM,MESO,UVM,DLBC
AC000032.2	BRCA,OV,LUSC,BLCA,ESCA,TGCT
AC003986.7	GBM,LGG,PRAD,TGCT,THYM,CHOL
AC004988.1	THCA,LUSC,COAD,KIRP,TGCT,DLBC
AC005154.6	KIRP,READ,KICH,UVM,DLBC,CHOL
AC005519.4	GBM,THCA,SARC,TGCT,UVM,CHOL
AC006369.2	BRCA,KIRC,THCA,LUSC,LAML,CHOL
AC007566.10	GBM,LGG,THCA,THYM,UVM,DLBC
AC007750.5	GBM,BLCA,PAAD,TGCT,DLBC,UCS
AC009133.12	KIRC,PRAD,KIRP,ESCA,THYM,CHOL
AC010976.2	GBM,LUSC,SKCM,COAD,KIRP,UVM
AC012358.7	LUAD,LAML,ESCA,THYM,MESO,UVM
AC012360.6	THCA,PRAD,BLCA,LAML,KICH,ACC
AC013463.2	PRAD,KIRP,LAML,ACC,DLBC,CHOL
AC017104.6	TGCT,KICH,MESO,UVM,DLBC,CHOL
AC022182.3	THCA,SKCM,KIRP,SARC,TGCT,ACC
AC026471.6	KIRC,STAD,CESC,TGCT,ACC,CHOL
AC034220.3	LGG,SKCM,SARC,ACC,UVM,CHOL
AC074212.5	BRCA,LGG,LAML,PAAD,THYM,ACC
AC090587.2	GBM,LGG,THCA,TGCT,UCS,CHOL
AC093850.2	GBM,KIRC,THCA,SKCM,PAAD,TGCT
AC103563.8	KIRC,SKCM,KIRP,LAML,THYM,DLBC
AC104809.4	STAD,SARC,LAML,KICH,DLBC,CHOL
AC109642.1	LUAD,THCA,LUSC,PAAD,PCPG,KICH
AC116614.1	SARC,TGCT,THYM,KICH,ACC,UCS
AC144831.3	KIRC,LAML,TGCT,THYM,UVM,DLBC
ADORA2A-AS1	KIRP,LAML,TGCT,THYM,KICH,CHOL
AF127936.9	KIRC,THCA,LAML,TGCT,UVM,CHOL
AL122127.25	SKCM,STAD,PAAD,ESCA,TGCT,MESO
AL161668.5	LGG,BLCA,TGCT,THYM,KICH,CHOL
AP001046.5	PRAD,LIHC,TGCT,THYM,KICH,DLBC
AP001062.7	SKCM,ESCA,TGCT,KICH,UVM,CHOL
AP001505.10	BRCA,TGCT,THYM,UVM,DLBC,CHOL
AP001626.2	THCA,BLCA,SARC,TGCT,KICH,CHOL
AP4B1-AS1	GBM,THCA,TGCT,UVM,UCS,CHOL
BAALC-AS1	BRCA,SKCM,LIHC,SARC,LAML,UCS
BX322557.10	GBM,LGG,SARC,TGCT,THYM,UCS
C17orf82	THCA,BLCA,TGCT,THYM,ACC,CHOL
C1RL-AS1	LGG,TGCT,KICH,UVM,DLBC,CHOL
C20orf166-AS1	PRAD,SARC,LAML,READ,TGCT,UCS
CH17-340M24.3	GBM,SARC,PCPG,TGCT,KICH,UVM
CH17-360D5.2	LUAD,LGG,PRAD,SKCM,PAAD,TGCT
CPEB1-AS1	SKCM,KIRP,TGCT,THYM,KICH,MESO
CTB-113I20.2	GBM,PAAD,PCPG,TGCT,MESO,UCS
CTB-113P19.5	THCA,TGCT,THYM,DLBC,UCS,CHOL
CTB-129O4.1	PRAD,TGCT,THYM,KICH,DLBC,CHOL
CTC-231O11.1	TGCT,THYM,KICH,ACC,UVM,CHOL
CTC-255N20.1	GBM,KIRC,THCA,SKCM,KICH,ACC
CTC-296K1.3	PRAD,KIRP,READ,TGCT,KICH,CHOL
CTC-297N7.9	BRCA,LGG,PRAD,LIHC,THYM,CHOL
CTC-321K16.1	BRCA,LUAD,LGG,THCA,LUSC,KICH
CTC-457E21.9	OV,LGG,SARC,THYM,KICH,UCS
CTC-786C10.1	PRAD,KIRP,TGCT,KICH,UVM,CHOL
CTD-2035E11.4	GBM,PRAD,CESC,THYM,DLBC,UCS
CTD-2047H16.4	LAML,TGCT,THYM,KICH,DLBC,CHOL
CTD-2194D22.3	BRCA,HNSC,LUSC,BLCA,TGCT,THYM
CTD-2201G3.1	LGG,KIRP,THYM,KICH,ACC,CHOL
CTD-2265M8.2	PRAD,SKCM,LIHC,CESC,LAML,ESCA
CTD-2284J15.1	BRCA,PRAD,THYM,KICH,UCS,CHOL
CTD-2297D10.2	OV,KIRC,SKCM,TGCT,KICH,MESO
CTD-2311M21.3	OV,LUSC,SKCM,BLCA,TGCT,MESO
CTD-2377O17.1	KIRC,LUSC,KIRP,SARC,UVM,CHOL
CTD-2521M24.5	GBM,UCEC,ESCA,TGCT,MESO,UCS
CTD-2527I21.14	LGG,THCA,KIRP,ESCA,UVM,CHOL
CTD-2528L19.6	GBM,SKCM,KICH,UVM,UCS,CHOL
CTD-2583A14.8	LUSC,TGCT,KICH,ACC,UVM,CHOL
CTD-2600O9.2	CESC,PAAD,KICH,ACC,UVM,CHOL
CTD-2619J13.13	LUAD,HNSC,THCA,LUSC,STAD,ESCA
CTD-2649C14.2	KIRC,LGG,KICH,UVM,DLBC,CHOL
CTD-3032H12.2	GBM,LGG,CESC,TGCT,KICH,UCS
CTD-3099C6.11	LUSC,SKCM,TGCT,THYM,DLBC,CHOL
CTD-3252C9.4	THCA,PRAD,PAAD,TGCT,KICH,UVM
DLEU2L	LGG,THCA,LAML,PAAD,TGCT,UVM
DNAJC3-AS1	THCA,READ,THYM,MESO,UVM,CHOL
DNAJC9-AS1	GBM,THCA,PAAD,ESCA,THYM,ACC
ELOVL2-AS1	BRCA,LUSC,SARC,TGCT,UCS,CHOL
FLJ20021	GBM,COAD,LAML,TGCT,UVM,UCS
GUSBP11	THCA,PAAD,THYM,UVM,DLBC,CHOL
HCG11	PRAD,LIHC,PAAD,THYM,UVM,CHOL
HCG23	GBM,PRAD,THYM,MESO,DLBC,UCS
IGFBP7-AS1	GBM,SKCM,LAML,THYM,KICH,UVM
IL10RB-AS1	THCA,BLCA,SARC,TGCT,THYM,KICH
INHBA-AS1	LUSC,BLCA,SARC,LAML,TGCT,MESO
KB-1517D11.4	BRCA,KIRC,SARC,PAAD,MESO,UVM
KB-431C1.4	COAD,READ,TGCT,THYM,UVM,UCS
KB-68A7.1	LUAD,SKCM,KIRP,SARC,TGCT,CHOL
LBX1-AS1	LGG,LUSC,SKCM,SARC,MESO,UCS
LEF1-AS1	KIRC,KIRP,SARC,LAML,PAAD,THYM
LHFPL3-AS2	LUAD,LUSC,STAD,BLCA,KIRP,KICH
LIFR-AS1	THCA,SARC,LAML,READ,TGCT,THYM
LINC00683	PRAD,SARC,PAAD,TGCT,THYM,CHOL
LINC00890	LUSC,PRAD,SARC,TGCT,KICH,CHOL
LINC00893	THCA,COAD,PAAD,TGCT,THYM,UVM
LINC00968	GBM,LUAD,LGG,LUSC,LAML,PAAD
LINC01004	KIRC,LGG,KIRP,KICH,UVM,CHOL
LINC01096	LUSC,PAAD,TGCT,THYM,ACC,MESO
LINC01116	OV,SKCM,BLCA,KIRP,TGCT,KICH
LINC01358	LGG,LUSC,SKCM,BLCA,PAAD,UVM
LINC01391	LUSC,PRAD,SARC,TGCT,ACC,CHOL
LINC01420	GBM,THCA,TGCT,THYM,KICH,UVM
LINC01503	PRAD,LAML,TGCT,KICH,ACC,DLBC
LINC01552	OV,LUAD,KIRC,CESC,TGCT,MESO
LL0XNC01-7P3.1	GBM,TGCT,THYM,KICH,UVM,CHOL
LL22NC03-2H8.4	THCA,CESC,SARC,PCPG,TGCT,CHOL
LOXL1-AS1	GBM,LAML,KICH,ACC,DLBC,CHOL
MALAT1	GBM,TGCT,THYM,ACC,UVM,DLBC
MEG3	BRCA,THCA,PRAD,KIRP,READ,KICH
MIR100HG	PRAD,LAML,PAAD,TGCT,THYM,CHOL
MIR497HG	LUSC,PAAD,PCPG,KICH,DLBC,CHOL
MIR600HG	GBM,LAML,PAAD,THYM,KICH,CHOL
MMP24-AS1	THCA,LAML,THYM,KICH,UVM,DLBC
NCAM1-AS1	GBM,OV,LGG,SARC,LAML,TGCT
OIP5-AS1	KIRC,SKCM,SARC,TGCT,UVM,CHOL
P3H2-AS1	LUAD,HNSC,PRAD,KIRP,THYM,KICH
PCBP3-OT1	KIRC,LAML,TGCT,THYM,DLBC,UCS
PIK3CD-AS1	LGG,SKCM,KIRP,SARC,PAAD,TGCT
POU6F2-AS2	HNSC,LUSC,BLCA,ESCA,THYM,UCS
PRR34-AS1	THCA,TGCT,KICH,MESO,UCS,CHOL
PSMA3-AS1	PCPG,TGCT,THYM,MESO,UVM,CHOL
RAD51-AS1	KIRC,SKCM,TGCT,THYM,UVM,CHOL
RBM5-AS1	THCA,SARC,PAAD,THYM,UVM,UCS
RBMS3-AS3	LUAD,PRAD,KIRP,TGCT,KICH,CHOL
RNF217-AS1	OV,LUSC,COAD,LAML,TGCT,THYM
RP1-122P22.2	KIRC,PRAD,LAML,THYM,KICH,CHOL
RP1-198K11.5	READ,THYM,KICH,MESO,DLBC,CHOL
RP1-253P7.4	GBM,SARC,LAML,THYM,UVM,CHOL
RP1-269M15.3	OV,LUSC,PRAD,PAAD,DLBC,UCS
RP11-1000B6.3	THCA,ESCA,TGCT,THYM,KICH,CHOL
RP11-10J5.1	BRCA,KIRC,SKCM,TGCT,MESO,DLBC
RP11-120K24.3	KIRC,HNSC,CESC,KIRP,TGCT,KICH
RP11-126L15.4	ESCA,TGCT,THYM,KICH,DLBC,CHOL
RP11-1376P16.2	GBM,THCA,LAML,ESCA,THYM,DLBC
RP11-15A1.3	GBM,SARC,ESCA,THYM,KICH,ACC
RP11-161H23.9	UCEC,KIRC,LGG,SARC,KICH,MESO
RP11-196G18.22	PRAD,LAML,TGCT,THYM,ACC,CHOL
RP11-203M5.7	GBM,SARC,PCPG,TGCT,THYM,UVM
RP11-20I20.2	KIRC,THCA,KIRP,ESCA,THYM,KICH
RP11-21A7A.2	GBM,OV,THCA,SKCM,KIRP,SARC
RP11-21A7A.4	THCA,SKCM,SARC,LAML,KICH,UCS
RP11-21C4.1	BRCA,LUSC,PAAD,PCPG,KICH,CHOL
RP11-21L23.3	LUAD,KIRC,LUSC,THYM,KICH,CHOL
RP11-244F12.3	BRCA,SARC,ESCA,THYM,KICH,MESO
RP11-258C19.7	GBM,LGG,THCA,KIRP,DLBC,CHOL
RP11-264B17.3	GBM,KIRP,PAAD,PCPG,THYM,UVM
RP11-293M10.6	LGG,LUSC,PRAD,THYM,DLBC,CHOL
RP11-295P9.8	OV,LUSC,LAML,KICH,UCS,CHOL
RP11-33B1.4	GBM,SARC,TGCT,THYM,ACC,CHOL
RP11-350G8.5	OV,TGCT,THYM,KICH,ACC,CHOL
RP11-350N15.4	BRCA,OV,LUSC,CESC,ESCA,THYM
RP11-355O1.11	THCA,LUSC,SKCM,UVM,DLBC,CHOL
RP11-357H14.17	HNSC,LUSC,COAD,BLCA,ESCA,TGCT
RP11-370I10.12	KIRC,LUSC,CESC,LAML,ESCA,UVM
RP11-387A1.5	OV,LUAD,KIRC,KIRP,KICH,UVM
RP11-395N3.2	BRCA,THCA,LUSC,BLCA,TGCT,THYM
RP11-396F22.1	GBM,BLCA,THYM,KICH,UCS,CHOL
RP11-3D4.3	KIRC,LAML,TGCT,UVM,DLBC,CHOL
RP11-402J6.1	BRCA,LGG,SKCM,COAD,ACC,DLBC
RP11-405M12.4	SKCM,SARC,TGCT,THYM,ACC,DLBC
RP11-411K7.1	OV,HNSC,THCA,LUSC,BLCA,ESCA
RP11-415J8.3	GBM,LGG,THCA,TGCT,THYM,DLBC
RP11-422N16.3	BRCA,LUAD,LIHC,PAAD,THYM,CHOL
RP11-438D14.2	KIRC,KIRP,SARC,TGCT,ACC,MESO
RP11-438D14.3	OV,BLCA,CESC,SARC,TGCT,MESO
RP11-43F13.4	HNSC,COAD,STAD,LIHC,THYM,MESO
RP11-441F2.5	GBM,LGG,PRAD,SKCM,SARC,CHOL
RP11-449J21.5	THCA,LIHC,LAML,TGCT,UVM,CHOL
RP11-458F8.4	GBM,KIRP,LAML,TGCT,KICH,DLBC
RP11-472N13.3	KIRC,BLCA,KIRP,SARC,THYM,ACC
RP11-474O21.5	OV,THCA,LAML,TGCT,MESO,CHOL
RP11-499P20.2	GBM,THCA,BLCA,KICH,UVM,CHOL
RP11-517I3.1	BRCA,LGG,THCA,BLCA,CESC,UCS
RP11-519G16.5	THCA,PRAD,ESCA,KICH,MESO,CHOL
RP11-548H3.1	LGG,PCPG,TGCT,THYM,DLBC,CHOL
RP11-548P2.2	LUSC,PRAD,ACC,MESO,DLBC,CHOL
RP11-620J15.3	KIRC,THCA,KIRP,SARC,THYM,CHOL
RP11-66N11.8	LGG,BLCA,READ,TGCT,THYM,KICH
RP11-66N24.3	GBM,LGG,THCA,PRAD,LAML,UVM
RP11-66N24.4	THCA,LUSC,KIRP,UVM,UCS,CHOL
RP11-696N14.1	BLCA,SARC,LAML,TGCT,UCS,CHOL
RP11-701P16.5	GBM,LUAD,THCA,LUSC,TGCT,CHOL
RP11-707P17.2	BRCA,LAML,TGCT,UVM,DLBC,CHOL
RP11-70D24.2	PRAD,BLCA,KIRP,PCPG,TGCT,DLBC
RP11-731J8.2	GBM,KIRC,SARC,THYM,MESO,UVM
RP11-736N17.8	HNSC,STAD,CESC,THYM,KICH,CHOL
RP11-73M7.6	GBM,LGG,SARC,TGCT,MESO,CHOL
RP11-792A8.4	GBM,TGCT,THYM,KICH,MESO,UVM
RP11-815I9.4	GBM,LAML,PAAD,ESCA,TGCT,THYM
RP11-819C21.1	GBM,UCEC,TGCT,THYM,KICH,DLBC
RP11-829H16.3	LUSC,PRAD,CESC,SARC,LAML,ESCA
RP11-82L18.2	LGG,THCA,LUSC,CESC,TGCT,ACC
RP11-84A19.3	GBM,LGG,THCA,LUSC,DLBC,UCS
RP11-86H7.7	LGG,LAML,TGCT,UVM,DLBC,CHOL
RP11-89K10.1	OV,SKCM,STAD,LAML,KICH,UCS
RP11-92A5.2	BRCA,PRAD,TGCT,THYM,ACC,UCS
RP11-94C24.13	THCA,BLCA,KIRP,ACC,UVM,CHOL
RP11-96D1.6	HNSC,LIHC,ESCA,THYM,KICH,CHOL
RP11-993B23.3	BRCA,HNSC,LUSC,BLCA,TGCT,CHOL
RP13-39P12.3	BRCA,CESC,LAML,THYM,MESO,UVM
RP13-516M14.10	GBM,THCA,KIRP,PAAD,THYM,UVM
RP13-580F15.2	THCA,LUSC,SKCM,THYM,KICH,DLBC
RP3-402G11.28	THCA,LUSC,SARC,LAML,UVM,CHOL
RP3-467L1.4	LGG,STAD,CESC,LAML,THYM,CHOL
RP3-508I15.21	HNSC,LGG,THCA,THYM,UVM,CHOL
RP3-510D11.2	GBM,LAML,TGCT,THYM,KICH,UVM
RP4-547N15.3	GBM,LUSC,LAML,TGCT,KICH,ACC
RP4-616B8.5	GBM,LUSC,PRAD,PAAD,ESCA,MESO
RP4-635E18.8	OV,THCA,SKCM,PAAD,ESCA,UVM
RP4-671O14.6	CESC,LAML,ESCA,TGCT,KICH,ACC
RP4-742J24.2	BLCA,TGCT,THYM,UVM,UCS,CHOL
RP4-758J18.7	GBM,THCA,KIRP,SARC,THYM,KICH
RP4-798P15.3	LAML,TGCT,THYM,KICH,UVM,CHOL
RP5-1050D4.5	THCA,SARC,PCPG,TGCT,THYM,UCS
RP5-827C21.4	THCA,PCPG,TGCT,THYM,UVM,CHOL
SATB1-AS1	COAD,CESC,LAML,THYM,KICH,DLBC
SLC25A25-AS1	GBM,KIRC,LAML,THYM,UVM,CHOL
SLC7A11-AS1	LUAD,HNSC,LUSC,LAML,KICH,UCS
SNHG12	LGG,THCA,PAAD,THYM,UCS,CHOL
SNHG16	THCA,PCPG,TGCT,THYM,UVM,DLBC
TARID	KIRC,PRAD,KIRP,TGCT,THYM,KICH
TMEM26-AS1	BRCA,THCA,THYM,KICH,UCS,CHOL
TOPORS-AS1	LUSC,BLCA,TGCT,THYM,MESO,CHOL
TUG1	LGG,THCA,PAAD,ESCA,MESO,CHOL
U91319.1	OV,LGG,THCA,PRAD,KIRP,CHOL
YEATS2-AS1	LUSC,KIRP,THYM,UVM,UCS,CHOL
YTHDF3-AS1	LAML,READ,TGCT,THYM,MESO,UCS
ZNF888	SKCM,BLCA,CESC,KIRP,THYM,UVM
AC002331.1	HNSC,STAD,BLCA,CESC,UCS
AC002454.1	OV,SARC,TGCT,THYM,KICH
AC002456.2	OV,SKCM,LAML,TGCT,ACC
AC004231.2	PRAD,COAD,STAD,CESC,CHOL
AC005013.5	LUSC,SARC,TGCT,THYM,KICH
AC005104.3	SKCM,SARC,THYM,UVM,UCS
AC007308.6	GBM,PRAD,TGCT,DLBC,CHOL
AC010095.5	THYM,KICH,UVM,DLBC,CHOL
AC012531.25	LUSC,KICH,MESO,DLBC,CHOL
AC017002.1	SKCM,BLCA,CESC,SARC,TGCT
AC019181.2	KIRC,KIRP,LAML,DLBC,CHOL
AC073283.7	BLCA,PAAD,READ,THYM,CHOL
AC074212.6	LGG,THCA,LAML,THYM,KICH
AC074286.1	PRAD,PCPG,TGCT,KICH,DLBC
AC083949.1	LUAD,LUSC,SKCM,PAAD,TGCT
AC093818.1	TGCT,THYM,KICH,DLBC,CHOL
AC124789.1	LIHC,KIRP,ESCA,TGCT,KICH
AC138035.2	THCA,SARC,THYM,MESO,CHOL
AC144831.1	KIRC,SARC,LAML,TGCT,THYM
AC226118.1	THCA,TGCT,THYM,KICH,UVM
AD000684.2	LUSC,PRAD,PAAD,UVM,CHOL
AF003625.3	OV,HNSC,LGG,LUSC,TGCT
AGAP2-AS1	KIRC,TGCT,KICH,UVM,CHOL
AL121578.2	BRCA,GBM,LGG,SKCM,TGCT
AP000355.2	KIRP,LAML,THYM,KICH,CHOL
AP000473.8	STAD,TGCT,THYM,KICH,CHOL
AP000487.5	BRCA,HNSC,LUSC,CESC,TGCT
AP000662.4	PRAD,PAAD,TGCT,THYM,KICH
AP000692.9	THYM,UVM,DLBC,UCS,CHOL
AP001626.1	PRAD,TGCT,KICH,UCS,CHOL
AP003774.1	KIRC,SKCM,COAD,TGCT,THYM
AP006621.6	GBM,KIRP,THYM,KICH,UVM
ARHGAP31-AS1	LAML,THYM,KICH,DLBC,UCS
BACE1-AS	TGCT,THYM,KICH,UVM,CHOL
C11orf97	OV,LGG,LUSC,KICH,CHOL
C15orf59-AS1	KIRC,LUSC,KIRP,PCPG,TGCT
C2orf48	GBM,LAML,THYM,ACC,MESO
CACNA1C-AS1	LAML,TGCT,THYM,DLBC,CHOL
CASC21	PRAD,ESCA,READ,THYM,UVM
CDKN2A-AS1	GBM,OV,SKCM,CESC,SARC
CTA-315H11.2	OV,LUSC,STAD,READ,ACC
CTA-363E19.2	GBM,READ,TGCT,KICH,UVM
CTB-1144G6.6	OV,LGG,PCPG,THYM,KICH
CTB-13F3.1	ESCA,TGCT,KICH,MESO,CHOL
CTB-147N14.6	THCA,KIRP,TGCT,KICH,ACC
CTB-176F20.3	GBM,BLCA,KICH,ACC,UVM
CTB-60B18.18	BRCA,LUSC,PRAD,THYM,MESO
CTC-1337H24.4	KIRC,LGG,TGCT,UVM,CHOL
CTC-246B18.8	GBM,OV,LAML,THYM,UVM
CTC-296K1.4	PRAD,KIRP,READ,KICH,CHOL
CTC-425O23.2	GBM,SARC,TGCT,THYM,UCS
CTC-429P9.1	THCA,PAAD,TGCT,THYM,KICH
CTC-444N24.11	GBM,READ,KICH,ACC,CHOL
CTC-458I2.2	GBM,PRAD,LAML,ACC,MESO
CTC-471J1.2	SKCM,THYM,KICH,UVM,CHOL
CTC-529P8.1	LGG,SKCM,STAD,KIRP,ESCA
CTD-2006C1.2	GBM,LAML,THYM,UVM,DLBC
CTD-2033D15.3	LAML,ESCA,KICH,MESO,CHOL
CTD-2054N24.2	PRAD,THYM,UVM,UCS,CHOL
CTD-2095E4.5	GBM,TGCT,KICH,UVM,CHOL
CTD-2126E3.4	OV,SKCM,TGCT,ACC,UVM
CTD-2132N18.4	SARC,TGCT,THYM,KICH,CHOL
CTD-2341M24.1	THCA,PRAD,THYM,UVM,CHOL
CTD-2523D13.2	TGCT,ACC,UVM,DLBC,CHOL
CTD-2540L5.6	OV,LUSC,LAML,ESCA,DLBC
CTD-2574D22.2	THCA,SARC,TGCT,DLBC,UCS
CTD-2576D5.4	THCA,LAML,TGCT,MESO,CHOL
CTD-2595P9.4	OV,UCEC,BLCA,TGCT,THYM
CTD-2619J13.8	OV,SARC,KICH,UVM,CHOL
CTD-3064M3.7	THCA,LAML,PCPG,MESO,UVM
DICER1-AS1	THCA,PRAD,THYM,KICH,DLBC
DNMBP-AS1	LGG,LAML,PAAD,MESO,CHOL
DSCR4-IT1	STAD,BLCA,LIHC,TGCT,UCS
EIF1B-AS1	TGCT,KICH,ACC,UVM,CHOL
FAM181A-AS1	GBM,UCEC,LGG,CESC,TGCT
FGD5-AS1	LGG,TGCT,THYM,MESO,CHOL
GS1-24F4.2	LGG,SARC,LAML,UCS,CHOL
GS1-72M22.1	KIRC,TGCT,THYM,KICH,MESO
HCG15	TGCT,THYM,KICH,UVM,UCS
HELLPAR	LGG,PRAD,TGCT,MESO,CHOL
IL12A-AS1	SARC,LAML,MESO,UCS,CHOL
IQCH-AS1	GBM,THCA,TGCT,KICH,UVM
KMT2E-AS1	GBM,ESCA,TGCT,THYM,CHOL
LA16c-358B7.4	GBM,KIRC,KICH,UVM,CHOL
LINC00087	KIRC,ESCA,TGCT,THYM,KICH
LINC00092	PRAD,PAAD,TGCT,KICH,DLBC
LINC00323	OV,KIRC,LGG,THYM,CHOL
LINC00327	LUAD,HNSC,LUSC,UCS,CHOL
LINC00491	OV,LUAD,SKCM,TGCT,THYM
LINC00511	THCA,TGCT,KICH,UCS,CHOL
LINC00630	THCA,TGCT,THYM,MESO,UVM
LINC00675	LGG,LAML,TGCT,KICH,CHOL
LINC00689	PRAD,SARC,PCPG,TGCT,THYM
LINC00863	GBM,LGG,LIHC,TGCT,DLBC
LINC00900	PAAD,READ,TGCT,KICH,DLBC
LINC00908	PRAD,SARC,TGCT,THYM,KICH
LINC00936	SKCM,TGCT,THYM,UCS,CHOL
LINC00989	THCA,KIRP,LAML,PCPG,MESO
LINC01137	THCA,COAD,THYM,UVM,DLBC
LINC01268	PCPG,TGCT,THYM,KICH,CHOL
LINC01290	LUAD,STAD,CESC,ESCA,ACC
LINC01415	BRCA,KIRC,PAAD,THYM,KICH
LINC01521	LIHC,TGCT,ACC,UCS,CHOL
LINC01547	LAML,TGCT,KICH,UVM,CHOL
LIPE-AS1	GBM,LGG,THCA,TGCT,UVM
LL0XNC01-250H12.3	HNSC,PRAD,STAD,SARC,TGCT
MBNL1-AS1	PRAD,PAAD,PCPG,TGCT,THYM
MGC16275	THCA,SKCM,STAD,KICH,DLBC
MLLT4-AS1	THCA,SKCM,THYM,MESO,CHOL
MORF4L2-AS1	THCA,PRAD,THYM,UVM,CHOL
NADK2-AS1	THCA,SARC,THYM,UVM,CHOL
NPSR1-AS1	HNSC,THCA,LUSC,CESC,KICH
OLMALINC	LGG,PRAD,KICH,DLBC,CHOL
OTUD6B-AS1	PAAD,TGCT,KICH,ACC,UCS
OXCT1-AS1	SKCM,KIRP,SARC,ESCA,THYM
PAQR9-AS1	GBM,KIRC,LAML,TGCT,CHOL
PAXBP1-AS1	LGG,THCA,TGCT,THYM,DLBC
PCAT29	SKCM,TGCT,MESO,DLBC,CHOL
PRKG1-AS1	BLCA,CESC,SARC,PAAD,PCPG
PRR7-AS1	LAML,THYM,ACC,DLBC,CHOL
PTGES2-AS1	KIRP,ESCA,UVM,DLBC,CHOL
PTOV1-AS2	HNSC,COAD,SARC,PCPG,CHOL
RNF144A-AS1	KIRP,PAAD,TGCT,MESO,CHOL
RP1-170O19.17	COAD,BLCA,TGCT,ACC,CHOL
RP1-206D15.6	KIRC,LGG,THYM,UCS,CHOL
RP1-27K12.4	LUAD,LUSC,ESCA,THYM,CHOL
RP1-68D18.2	BLCA,THYM,KICH,UVM,DLBC
RP1-93H18.1	LUSC,BLCA,PAAD,THYM,KICH
RP11-100L22.1	KIRC,THCA,PCPG,KICH,CHOL
RP11-1055B8.4	GBM,THCA,READ,UCS,CHOL
RP11-1069G10.1	PRAD,TGCT,THYM,KICH,CHOL
RP11-1081L13.4	LUSC,SKCM,LAML,THYM,UVM
RP11-1114A5.4	KIRC,THYM,KICH,UVM,CHOL
RP11-119J18.1	BRCA,GBM,HNSC,THCA,KICH
RP11-127I20.5	OV,LUAD,PRAD,BLCA,CHOL
RP11-128A17.2	SARC,TGCT,DLBC,UCS,CHOL
RP11-1391J7.1	GBM,THCA,LAML,THYM,CHOL
RP11-147L13.11	KIRC,TGCT,THYM,KICH,CHOL
RP11-15H20.6	KIRC,LUSC,BLCA,TGCT,CHOL
RP11-164H13.1	STAD,LAML,PAAD,TGCT,CHOL
RP11-169D4.2	THCA,LIHC,PAAD,TGCT,CHOL
RP11-171I2.4	THCA,SKCM,THYM,KICH,UVM
RP11-192H23.8	THCA,TGCT,KICH,DLBC,CHOL
RP11-19E11.1	SARC,TGCT,KICH,ACC,CHOL
RP11-212I21.4	LGG,CESC,LAML,THYM,UVM
RP11-223C24.1	LAML,TGCT,THYM,DLBC,CHOL
RP11-225H22.4	SKCM,SARC,KICH,ACC,UVM
RP11-226L15.5	PRAD,SKCM,LAML,TGCT,CHOL
RP11-244H3.1	TGCT,THYM,KICH,DLBC,CHOL
RP11-259K5.2	THCA,THYM,KICH,DLBC,CHOL
RP11-259N19.1	KIRC,PCPG,TGCT,KICH,CHOL
RP11-261P9.4	GBM,LAML,TGCT,THYM,CHOL
RP11-264I13.2	OV,LUSC,TGCT,THYM,CHOL
RP11-264M12.2	GBM,LGG,LAML,ACC,CHOL
RP11-273B20.1	TGCT,THYM,KICH,MESO,CHOL
RP11-276H7.2	THCA,TGCT,THYM,KICH,CHOL
RP11-283G6.4	THCA,THYM,KICH,UVM,UCS
RP11-284F21.7	LGG,ESCA,ACC,DLBC,CHOL
RP11-295M3.4	UCEC,PRAD,TGCT,THYM,KICH
RP11-2E11.9	SARC,LAML,MESO,UVM,CHOL
RP11-312B8.1	THCA,TGCT,THYM,KICH,DLBC
RP11-322E11.5	GBM,KIRC,SARC,TGCT,KICH
RP11-325L12.6	LUAD,LUSC,PCPG,TGCT,MESO
RP11-327F22.6	BRCA,BLCA,LAML,ESCA,DLBC
RP11-332H14.2	TGCT,THYM,UVM,DLBC,CHOL
RP11-332M2.1	LAML,ESCA,TGCT,THYM,KICH
RP11-336K24.12	KIRP,TGCT,KICH,UVM,CHOL
RP11-33O4.1	TGCT,THYM,UVM,UCS,CHOL
RP11-342K6.2	KIRC,THCA,SARC,PCPG,KICH
RP11-34A14.3	SKCM,LAML,THYM,KICH,CHOL
RP11-352D13.6	KIRC,TGCT,KICH,UVM,CHOL
RP11-359E3.4	THCA,STAD,SARC,TGCT,THYM
RP11-359J14.2	GBM,THCA,SARC,TGCT,THYM
RP11-363E7.4	OV,THCA,BLCA,TGCT,KICH
RP11-366F6.2	HNSC,LUSC,CESC,SARC,TGCT
RP11-368I7.4	UCEC,KIRC,TGCT,KICH,DLBC
RP11-379F4.4	OV,PRAD,CESC,KIRP,PAAD
RP11-388P9.2	BRCA,LGG,PRAD,LAML,CHOL
RP11-38J22.3	OV,CESC,LAML,KICH,CHOL
RP11-3B7.1	BRCA,SARC,LAML,TGCT,KICH
RP11-400F19.6	PCPG,TGCT,ACC,UVM,UCS
RP11-400K9.4	KIRC,KIRP,READ,TGCT,KICH
RP11-401P9.6	LUAD,COAD,LAML,READ,KICH
RP11-404F10.2	PAAD,TGCT,THYM,UVM,DLBC
RP11-415F23.4	LAML,THYM,KICH,UVM,DLBC
RP11-417E7.1	THCA,PAAD,ESCA,TGCT,KICH
RP11-423P10.2	SKCM,THYM,UVM,DLBC,CHOL
RP11-426C22.5	THCA,PAAD,TGCT,THYM,DLBC
RP11-428K3.1	THCA,KICH,MESO,DLBC,CHOL
RP11-443B7.1	GBM,TGCT,THYM,KICH,CHOL
RP11-449P15.2	GBM,KIRC,PRAD,THYM,KICH
RP11-465N4.4	THYM,UVM,DLBC,UCS,CHOL
RP11-46F15.2	GBM,KIRC,THYM,UVM,CHOL
RP11-47A8.5	LUSC,STAD,ESCA,THYM,UVM
RP11-480C22.1	GBM,LGG,THYM,KICH,CHOL
RP11-486L19.2	HNSC,LUSC,PRAD,BLCA,THYM
RP11-48B3.3	TGCT,THYM,KICH,UCS,CHOL
RP11-48B3.5	HNSC,COAD,BLCA,CESC,KICH
RP11-493L12.4	SKCM,LAML,ESCA,TGCT,ACC
RP11-506H20.1	SARC,READ,THYM,MESO,UVM
RP11-508N22.12	GBM,TGCT,THYM,UVM,CHOL
RP11-510M2.5	OV,LIHC,THYM,DLBC,CHOL
RP11-51J9.5	THCA,PCPG,TGCT,THYM,CHOL
RP11-524F11.1	GBM,LGG,LAML,UVM,CHOL
RP11-524H19.2	KIRC,LUSC,PRAD,KIRP,CHOL
RP11-530C5.1	THCA,SARC,TGCT,THYM,MESO
RP11-539L10.2	THCA,SKCM,TGCT,THYM,MESO
RP11-53O19.3	THYM,KICH,UVM,DLBC,CHOL
RP11-540B6.6	GBM,CESC,THYM,KICH,UCS
RP11-547D24.1	KIRC,THCA,TGCT,KICH,CHOL
RP11-54O7.1	OV,KIRP,LAML,TGCT,KICH
RP11-559N14.5	GBM,HNSC,TGCT,UVM,CHOL
RP11-568J23.5	TGCT,THYM,UVM,DLBC,CHOL
RP11-575L7.8	PRAD,SARC,UVM,UCS,CHOL
RP11-57H14.4	GBM,KIRC,THCA,TGCT,CHOL
RP11-585P4.6	CESC,SARC,LAML,PCPG,UVM
RP11-586D19.1	GBM,PRAD,TGCT,ACC,DLBC
RP11-598F7.4	LGG,BLCA,TGCT,THYM,MESO
RP11-617F23.1	KIRC,SARC,TGCT,THYM,KICH
RP11-619A14.2	OV,STAD,PAAD,READ,CHOL
RP11-61I13.3	GBM,LUAD,LGG,LAML,CHOL
RP11-622A1.2	KIRC,KIRP,TGCT,KICH,CHOL
RP11-627G23.1	BLCA,TGCT,THYM,DLBC,CHOL
RP11-62F24.2	THCA,PAAD,ESCA,KICH,ACC
RP11-638I2.9	HNSC,LAML,ESCA,THYM,CHOL
RP11-666A8.9	LUSC,SKCM,LAML,THYM,UVM
RP11-670E13.6	TGCT,THYM,KICH,UCS,CHOL
RP11-677M14.3	LUAD,THCA,LAML,KICH,MESO
RP11-67L2.2	LAML,ESCA,PCPG,TGCT,DLBC
RP11-67L3.5	THCA,SKCM,BLCA,KIRP,TGCT
RP11-704J17.5	OV,LGG,SKCM,MESO,UCS
RP11-70L8.4	GBM,LUSC,ESCA,THYM,UVM
RP11-727F15.9	LGG,PRAD,TGCT,DLBC,CHOL
RP11-734K2.4	TGCT,THYM,KICH,UVM,CHOL
RP11-737O24.5	SARC,LAML,ESCA,UCS,CHOL
RP11-755F10.3	GBM,LGG,TGCT,UVM,CHOL
RP11-77K12.9	TGCT,THYM,KICH,UVM,CHOL
RP11-787I22.3	LAML,ESCA,THYM,UVM,DLBC
RP11-805I24.3	LUAD,LUSC,PRAD,ESCA,READ
RP11-815J21.4	HNSC,LAML,PCPG,KICH,CHOL
RP11-83A24.2	LGG,READ,THYM,KICH,UVM
RP11-843P14.2	SARC,THYM,UVM,DLBC,UCS
RP11-849H4.4	GBM,THCA,ESCA,UVM,CHOL
RP11-863P13.3	LUAD,THCA,TGCT,THYM,CHOL
RP11-867G23.8	LAML,TGCT,THYM,UVM,CHOL
RP11-86K22.2	OV,SARC,TGCT,ACC,MESO
RP11-93B14.9	GBM,LUSC,SARC,TGCT,DLBC
RP11-964E11.2	LUAD,CESC,SARC,TGCT,THYM
RP11-968A15.2	LUSC,TGCT,THYM,UVM,CHOL
RP11-97O12.6	KIRC,LAML,THYM,KICH,CHOL
RP11-98D18.3	LUSC,SKCM,BLCA,TGCT,MESO
RP13-766D20.2	BRCA,LUAD,TGCT,THYM,MESO
RP3-329A5.8	THCA,THYM,UVM,DLBC,CHOL
RP3-388E23.2	GBM,THCA,LAML,TGCT,UVM
RP3-402G11.27	GBM,LGG,LUSC,PAAD,UVM
RP3-406A7.7	KIRP,LAML,TGCT,THYM,MESO
RP3-414A15.10	THCA,KIRP,LAML,KICH,CHOL
RP3-512B11.3	LUAD,SKCM,TGCT,THYM,UCS
RP3-523E19.2	LGG,TGCT,MESO,UVM,CHOL
RP4-530I15.9	LIHC,TGCT,THYM,UVM,DLBC
RP4-568C11.4	KIRP,PAAD,TGCT,THYM,CHOL
RP4-601P9.2	BLCA,TGCT,KICH,ACC,CHOL
RP4-668J24.2	LUAD,PRAD,SKCM,TGCT,MESO
RP4-773N10.4	GBM,LGG,THYM,MESO,CHOL
RP4-799P18.2	OV,LUAD,LUSC,THYM,KICH
RP5-1074L1.4	THCA,PRAD,READ,UVM,CHOL
RP5-1139B12.4	THCA,LUSC,SKCM,ESCA,CHOL
RP5-1172A22.1	THCA,PAAD,TGCT,DLBC,CHOL
RP5-1198O20.4	BRCA,SKCM,ESCA,THYM,ACC
RP5-855D21.2	KIRC,SKCM,ESCA,UVM,CHOL
RP5-894A10.6	LUSC,SKCM,CESC,LAML,TGCT
RP5-967N21.11	LGG,READ,THYM,DLBC,CHOL
SCGB1B2P	LGG,TGCT,THYM,KICH,UCS
SLC22A18AS	PRAD,LIHC,TGCT,THYM,DLBC
SLC2A1-AS1	LUAD,LUSC,TGCT,THYM,CHOL
SNHG19	PAAD,KICH,UVM,DLBC,CHOL
SNHG3	LGG,PRAD,KICH,UCS,CHOL
SNHG9	GBM,THCA,LAML,TGCT,THYM
SPACA6P	KIRC,THCA,THYM,KICH,CHOL
STARD7-AS1	TGCT,THYM,KICH,UVM,CHOL
TMEM191A	BRCA,TGCT,THYM,UVM,UCS
TP73-AS1	LGG,READ,TGCT,THYM,KICH
TRAM2-AS1	GBM,THCA,TGCT,THYM,CHOL
UCKL1-AS1	GBM,THYM,KICH,DLBC,CHOL
UGDH-AS1	THCA,TGCT,THYM,UCS,CHOL
UNC5B-AS1	THCA,PRAD,TGCT,THYM,CHOL
UNQ6494	SKCM,TGCT,UVM,DLBC,CHOL
USP3-AS1	THCA,LAML,TGCT,THYM,DLBC
VIM-AS1	LGG,THCA,BLCA,TGCT,KICH
WDFY3-AS2	THCA,LIHC,LAML,THYM,ACC
WWTR1-AS1	THCA,TGCT,THYM,KICH,CHOL
Z83851.4	ESCA,THYM,KICH,UVM,CHOL
ZFHX4-AS1	BRCA,PAAD,THYM,ACC,CHOL
ZNF32-AS2	GBM,LGG,THCA,THYM,UCS
ZNF571-AS1	GBM,TGCT,THYM,UVM,CHOL
ZNRD1-AS1	THCA,SKCM,LAML,TGCT,CHOL
A2M-AS1	THCA,TGCT,THYM,DLBC
ABALON	THCA,TGCT,UCS,CHOL
AC000120.7	THYM,KICH,UVM,CHOL
AC002059.10	BLCA,KIRP,TGCT,DLBC
AC002076.10	STAD,THYM,KICH,UVM
AC004019.13	LGG,TGCT,KICH,CHOL
AC004076.5	GBM,OV,LAML,KICH
AC004160.4	LIHC,LAML,THYM,CHOL
AC004538.3	PAAD,THYM,KICH,CHOL
AC004906.3	LAML,ESCA,THYM,DLBC
AC005253.2	THCA,LUSC,KIRP,UVM
AC005609.17	BRCA,ESCA,MESO,UVM
AC005932.1	SARC,ESCA,THYM,CHOL
AC006116.24	TGCT,THYM,UCS,CHOL
AC006273.5	PRAD,TGCT,THYM,KICH
AC006538.1	LAML,THYM,KICH,CHOL
AC006547.13	LGG,LAML,KICH,CHOL
AC006942.4	LGG,LAML,PAAD,KICH
AC007038.7	SKCM,TGCT,UVM,CHOL
AC007228.11	KIRC,ESCA,TGCT,CHOL
AC007277.3	COAD,PCPG,READ,TGCT
AC007278.3	LAML,ESCA,TGCT,DLBC
AC009495.2	GBM,PRAD,THYM,UVM
AC010524.2	BLCA,CESC,SARC,THYM
AC011298.2	THCA,PAAD,TGCT,THYM
AC013264.2	LUSC,LAML,TGCT,THYM
AC013275.2	LUAD,TGCT,THYM,KICH
AC015849.16	LGG,TGCT,THYM,DLBC
AC016700.5	THYM,UVM,UCS,CHOL
AC016722.4	TGCT,THYM,UVM,CHOL
AC016735.1	PAAD,TGCT,THYM,KICH
AC022007.5	THCA,THYM,KICH,UVM
AC023590.1	SKCM,TGCT,DLBC,CHOL
AC024592.9	LUSC,STAD,BLCA,CHOL
AC026202.3	THCA,THYM,MESO,CHOL
AC067945.4	THCA,LAML,DLBC,CHOL
AC073316.1	THCA,PRAD,THYM,ACC
AC090286.4	KIRC,SKCM,KIRP,KICH
AC091878.1	THCA,SARC,PCPG,THYM
AC093323.3	ESCA,THYM,KICH,ACC
AC096579.13	LUAD,TGCT,MESO,CHOL
AC099684.1	LAML,ESCA,KICH,CHOL
AC114730.5	GBM,COAD,STAD,CESC
AC114803.3	GBM,KIRC,ACC,UCS
AC118754.4	HNSC,STAD,LAML,KICH
AC130469.2	SARC,LAML,MESO,CHOL
AC142472.6	THCA,TGCT,THYM,KICH
AC144652.1	TGCT,THYM,ACC,CHOL
AC145110.1	THCA,LUSC,KIRP,CHOL
AF064860.7	BRCA,GBM,LUSC,BLCA
AJ003147.9	LUSC,SKCM,TGCT,ACC
AJ011932.1	PRAD,TGCT,THYM,KICH
AL035610.1	BRCA,KIRC,TGCT,KICH
ALG13-AS1	SARC,LAML,THYM,UVM
AP000697.6	BLCA,KICH,MESO,CHOL
AP001258.4	THCA,TGCT,THYM,KICH
AP003068.9	TGCT,THYM,UVM,DLBC
AQP4-AS1	HNSC,SKCM,TGCT,UVM
ARAP1-AS2	LGG,LAML,THYM,CHOL
ARHGAP5-AS1	LAML,TGCT,THYM,ACC
BAIAP2-AS1	TGCT,THYM,KICH,CHOL
BHLHE40-AS1	SKCM,THYM,DLBC,CHOL
C14orf132	KIRC,LAML,PCPG,TGCT
C2-AS1	LAML,ESCA,DLBC,CHOL
C22orf34	PCPG,THYM,MESO,UVM
C5orf66	LUSC,TGCT,KICH,UVM
CACNA1C-AS2	LAML,TGCT,THYM,CHOL
CACNA1G-AS1	SARC,TGCT,THYM,UCS
CASC15	THCA,PAAD,DLBC,CHOL
CASC2	GBM,LGG,THCA,THYM
CCND2-AS1	OV,KIRP,THYM,KICH
CCND2-AS2	OV,SARC,THYM,KICH
CELF2-AS1	GBM,THCA,KICH,DLBC
CH17-360D5.3	LUAD,LUSC,SKCM,TGCT
CH17-437K3.1	TGCT,THYM,KICH,CHOL
COL18A1-AS1	TGCT,THYM,KICH,CHOL
CTA-221G9.12	OV,LUSC,LAML,CHOL
CTA-293F17.1	GBM,LUAD,THYM,CHOL
CTA-363E6.2	LUSC,CESC,TGCT,UCS
CTA-384D8.34	BLCA,SARC,TGCT,DLBC
CTA-796E4.5	LUSC,LIHC,SARC,THYM
CTA-984G1.5	LAML,THYM,KICH,CHOL
CTB-107G13.1	PRAD,CESC,THYM,KICH
CTB-31N19.3	LGG,LAML,TGCT,DLBC
CTB-60B18.10	SKCM,THYM,ACC,UVM
CTBP1-AS2	PRAD,PCPG,TGCT,KICH
CTC-276P9.4	OV,LUSC,ESCA,TGCT
CTC-277H1.7	GBM,THCA,TGCT,UVM
CTC-325H20.2	OV,LGG,THYM,KICH
CTC-338M12.5	LGG,THCA,THYM,DLBC
CTC-339F2.2	PCPG,KICH,MESO,UVM
CTC-366B18.4	LGG,UVM,DLBC,CHOL
CTC-435M10.12	LGG,PAAD,UVM,CHOL
CTC-441N14.2	GBM,LGG,THCA,TGCT
CTC-444N24.8	KIRC,LGG,TGCT,CHOL
CTC-510F12.2	PRAD,SARC,TGCT,THYM
CTC-523E23.4	TGCT,KICH,UVM,DLBC
CTC-526N19.1	TGCT,THYM,KICH,CHOL
CTC-543D15.8	LIHC,TGCT,KICH,CHOL
CTD-2006C1.12	SARC,TGCT,UVM,CHOL
CTD-2008P7.9	KIRC,THCA,BLCA,KIRP
CTD-2012K14.6	KIRC,THYM,DLBC,CHOL
CTD-2013N24.2	SARC,TGCT,THYM,UVM
CTD-2015G9.2	KIRC,PRAD,TGCT,KICH
CTD-2017F17.2	THYM,UVM,UCS,CHOL
CTD-2035E11.5	KIRP,TGCT,THYM,CHOL
CTD-2194D22.4	LUSC,PRAD,TGCT,THYM
CTD-2223O18.1	KIRC,LGG,SARC,ACC
CTD-2267D19.3	OV,STAD,TGCT,THYM
CTD-2270L9.4	GBM,SARC,TGCT,MESO
CTD-2292M16.8	TGCT,THYM,UVM,CHOL
CTD-2349P21.10	KIRP,TGCT,UVM,CHOL
CTD-2371O3.3	PRAD,THYM,UVM,CHOL
CTD-2377D24.6	HNSC,LUSC,ESCA,KICH
CTD-2501M5.1	KIRC,LGG,THCA,TGCT
CTD-2517O10.6	GBM,LGG,PCPG,CHOL
CTD-2547L16.1	THCA,LUSC,KICH,CHOL
CTD-2562G15.3	THYM,KICH,UVM,CHOL
CTD-2587H24.14	THYM,KICH,UVM,CHOL
CTD-2619J13.14	THCA,TGCT,KICH,UVM
CTD-2636A23.2	ESCA,TGCT,ACC,CHOL
CTD-2666L21.1	THCA,TGCT,THYM,UVM
CTD-3001H11.2	LGG,THYM,DLBC,CHOL
CTD-3076O17.2	OV,LUSC,STAD,THYM
CTD-3193K9.11	GBM,CESC,THYM,CHOL
CTD-3193K9.3	LAML,THYM,MESO,DLBC
CTD-3193O13.1	THCA,KIRP,ACC,CHOL
CTD-3193O13.8	THCA,SARC,TGCT,MESO
CTD-3195I5.3	LAML,THYM,UVM,CHOL
CTD-3203P2.3	OV,SARC,KICH,CHOL
CTD-3234P18.6	UVM,DLBC,UCS,CHOL
DKFZP434I0714	TGCT,THYM,UVM,CHOL
DLGAP1-AS1	GBM,THYM,KICH,CHOL
DSG2-AS1	SKCM,STAD,LAML,KICH
EGOT	THCA,PRAD,LAML,KICH
F11-AS1	LUAD,KIRC,KICH,CHOL
FAM212B-AS1	SKCM,SARC,TGCT,ACC
FLJ27354	BRCA,KIRP,KICH,MESO
FLJ38122	PAAD,TGCT,THYM,CHOL
FLJ44511	LAML,TGCT,ACC,CHOL
FOXP4-AS1	PRAD,SARC,TGCT,MESO
FSIP2-AS1	KIRP,LAML,THYM,UVM
FTX	HNSC,THYM,MESO,UVM
HCG16	TGCT,THYM,KICH,UVM
HCG18	THCA,SKCM,TGCT,CHOL
HNF1A-AS1	LUAD,PAAD,TGCT,UCS
HPN-AS1	GBM,PRAD,TGCT,CHOL
HYI-AS1	TGCT,THYM,DLBC,CHOL
INAFM2	THCA,THYM,KICH,DLBC
INTS6-AS1	TGCT,THYM,UVM,CHOL
ITPR1-AS1	THCA,SARC,THYM,UVM
KB-1507C5.4	THCA,TGCT,THYM,UVM
KB-431C1.5	THCA,PRAD,SARC,UVM
KIAA0087	PRAD,THYM,UVM,CHOL
KLF3-AS1	THCA,TGCT,THYM,UVM
KRTAP5-AS1	OV,LAML,THYM,KICH
KTN1-AS1	BRCA,TGCT,THYM,KICH
LA16c-380H5.1	THCA,LAML,MESO,CHOL
LA16c-380H5.5	TGCT,THYM,KICH,MESO
LENG8-AS1	SARC,PAAD,THYM,CHOL
LHFPL3-AS1	LUAD,KICH,UVM,CHOL
LINC00094	PAAD,TGCT,DLBC,CHOL
LINC00174	GBM,TGCT,THYM,UVM
LINC00324	GBM,TGCT,KICH,CHOL
LINC00346	TGCT,THYM,KICH,UVM
LINC00494	LUAD,LAML,THYM,CHOL
LINC00574	TGCT,KICH,DLBC,CHOL
LINC00622	SARC,LAML,THYM,CHOL
LINC00652	THCA,TGCT,THYM,KICH
LINC00659	KIRP,KICH,DLBC,CHOL
LINC00662	LGG,TGCT,KICH,UCS
LINC00672	PRAD,THYM,KICH,CHOL
LINC00843	TGCT,THYM,UVM,CHOL
LINC00853	KIRC,TGCT,KICH,CHOL
LINC00885	KIRC,PRAD,KICH,CHOL
LINC00886	LGG,THCA,TGCT,KICH
LINC00909	OV,ESCA,UVM,CHOL
LINC00944	THCA,LAML,TGCT,THYM
LINC00950	ESCA,TGCT,UVM,CHOL
LINC00963	TGCT,UVM,DLBC,CHOL
LINC00998	GBM,KIRC,LAML,TGCT
LINC01001	TGCT,THYM,MESO,UCS
LINC01006	LGG,UVM,DLBC,UCS
LINC01082	PRAD,ESCA,READ,TGCT
LINC01140	THCA,PAAD,DLBC,CHOL
LINC01158	BRCA,SKCM,SARC,DLBC
LINC01202	LUSC,BLCA,ESCA,THYM
LINC01230	BRCA,KIRC,KIRP,THYM
LINC01239	TGCT,MESO,UCS,CHOL
LINC01305	UCEC,CESC,SARC,UCS
LINC01341	BLCA,LAML,TGCT,THYM
LINC01426	GBM,KIRC,TGCT,KICH
LINC01564	HNSC,LUSC,TGCT,CHOL
LINC01586	LGG,THCA,PAAD,TGCT
LL0XNC01-116E7.2	STAD,ESCA,TGCT,CHOL
LL22NC03-63E9.3	LUSC,TGCT,THYM,ACC
LRP4-AS1	LGG,THCA,ESCA,TGCT
LUCAT1	GBM,THCA,LAML,CHOL
MAFG-AS1	THYM,KICH,UVM,CHOL
MAMDC2-AS1	LAML,TGCT,THYM,UCS
MANEA-AS1	TGCT,THYM,UVM,DLBC
MCCC1-AS1	THYM,UVM,DLBC,CHOL
MEIS1-AS2	SARC,TGCT,THYM,ACC
MESTIT1	KIRC,BLCA,LAML,TGCT
MFI2-AS1	PAAD,ESCA,TGCT,CHOL
MIMT1	BRCA,SARC,TGCT,ACC
MIR181A2HG	THCA,TGCT,THYM,CHOL
MIR222HG	PRAD,PCPG,TGCT,THYM
MIR22HG	PRAD,LAML,DLBC,CHOL
MIR99AHG	PAAD,READ,TGCT,CHOL
MKX-AS1	LGG,PRAD,SARC,PCPG
NARF-IT1	LGG,KIRP,UVM,CHOL
NCK1-AS1	GBM,OV,LUSC,THYM
NDUFA6-AS1	LGG,TGCT,UVM,CHOL
NEXN-AS1	LGG,THCA,ACC,CHOL
NFIA-AS2	LGG,TGCT,KICH,DLBC
NRSN2-AS1	THCA,THYM,KICH,CHOL
OGFRP1	TGCT,THYM,KICH,CHOL
OVOL1-AS1	HNSC,LUSC,ESCA,TGCT
PAXIP1-AS2	KIRC,LGG,PAAD,CHOL
PCAT1	PRAD,LAML,THYM,UVM
PINK1-AS	LGG,TGCT,THYM,CHOL
PKI55	GBM,KIRC,UVM,CHOL
PP12613	KIRC,SKCM,TGCT,DLBC
PTCSC2	LUSC,CESC,ESCA,THYM
PVRL3-AS1	GBM,THCA,TGCT,THYM
PVT1	KIRC,TGCT,UVM,CHOL
RAB11B-AS1	GBM,THCA,THYM,DLBC
RARA-AS1	THCA,LAML,TGCT,THYM
RASAL2-AS1	SARC,LAML,THYM,CHOL
RBPMS-AS1	OV,LGG,SARC,UVM
RNF219-AS1	LGG,SKCM,UVM,UCS
RNU6ATAC35P	LGG,THCA,PRAD,LIHC
RP1-118J21.25	LGG,THYM,KICH,CHOL
RP1-159A19.4	THYM,ACC,UVM,DLBC
RP1-161P9.5	HNSC,CESC,PAAD,THYM
RP1-170O19.24	COAD,LAML,READ,KICH
RP1-202O8.2	LUSC,LAML,ESCA,THYM
RP1-292L20.3	THCA,THYM,ACC,CHOL
RP1-317E23.3	PCPG,KICH,UVM,CHOL
RP1-60O19.1	THCA,TGCT,KICH,CHOL
RP1-63G5.5	THCA,PRAD,KIRP,PAAD
RP1-67A8.3	ESCA,THYM,KICH,UVM
RP11-1055B8.3	LGG,SKCM,TGCT,CHOL
RP11-1060J15.9	KIRC,SKCM,SARC,THYM
RP11-1082L8.3	GBM,LGG,PRAD,ESCA
RP11-108K14.12	STAD,LAML,TGCT,CHOL
RP11-1094M14.11	GBM,THCA,DLBC,CHOL
RP11-109J4.1	THYM,KICH,ACC,UCS
RP11-10A14.3	ESCA,ACC,MESO,CHOL
RP11-10C24.1	HNSC,PAAD,THYM,KICH
RP11-10C24.3	HNSC,PRAD,PAAD,THYM
RP11-10K16.1	PRAD,SARC,THYM,ACC
RP11-1109F11.5	TGCT,THYM,UVM,CHOL
RP11-110I1.12	THCA,TGCT,UVM,CHOL
RP11-111M22.3	THCA,THYM,UVM,DLBC
RP11-111M22.4	LUSC,ACC,UVM,CHOL
RP11-112J3.16	THCA,LAML,THYM,CHOL
RP11-114N19.3	THCA,THYM,UVM,CHOL
RP11-120M18.2	THCA,SKCM,LAML,THYM
RP11-121C2.2	LIHC,TGCT,MESO,CHOL
RP11-122K13.12	THCA,LAML,TGCT,UVM
RP11-1246C19.1	LIHC,ACC,MESO,CHOL
RP11-124N2.1	THCA,THYM,UVM,CHOL
RP11-1275H24.3	TGCT,THYM,KICH,DLBC
RP11-127B20.3	THYM,UVM,UCS,CHOL
RP11-12G12.7	GBM,PRAD,THYM,DLBC
RP11-12J10.4	GBM,UVM,DLBC,CHOL
RP11-138I18.2	GBM,LGG,PAAD,THYM
RP11-1398P2.1	GBM,LGG,THCA,DLBC
RP11-141J13.5	LUAD,LUSC,TGCT,KICH
RP11-152N13.5	TGCT,UVM,DLBC,CHOL
RP11-156P1.3	THCA,TGCT,KICH,MESO
RP11-15A1.2	GBM,THYM,MESO,UCS
RP11-15A1.8	LAML,ESCA,THYM,UVM
RP11-173C1.1	TGCT,THYM,KICH,UCS
RP11-17M16.2	PRAD,SKCM,SARC,DLBC
RP11-181G12.2	PCPG,TGCT,THYM,UVM
RP11-186N15.3	PRAD,TGCT,THYM,UVM
RP11-18H7.1	PCPG,TGCT,KICH,CHOL
RP11-190A12.8	LGG,THCA,TGCT,CHOL
RP11-199F11.2	KIRC,TGCT,THYM,CHOL
RP11-1C8.7	BRCA,LGG,LUSC,PRAD
RP11-203J24.9	THCA,READ,KICH,UCS
RP11-206L10.5	TGCT,THYM,UCS,CHOL
RP11-218F10.3	SKCM,LAML,UVM,CHOL
RP11-227F19.5	BRCA,LUSC,KICH,MESO
RP11-22C11.2	KIRC,KIRP,THYM,CHOL
RP11-235E17.6	THCA,THYM,UVM,CHOL
RP11-242D8.1	THCA,KIRP,TGCT,CHOL
RP11-248J18.3	ESCA,READ,THYM,KICH
RP11-250B2.5	LAML,TGCT,UVM,CHOL
RP11-253M7.1	PAAD,KICH,MESO,CHOL
RP11-26L20.4	KIRC,LUSC,SKCM,TGCT
RP11-274H2.2	KIRC,THCA,ESCA,MESO
RP11-278C7.5	COAD,READ,UVM,CHOL
RP11-285J16.1	KIRC,THYM,UVM,CHOL
RP11-286H15.1	LUAD,TGCT,KICH,ACC
RP11-290L1.3	UCEC,BLCA,ESCA,CHOL
RP11-297B17.3	STAD,PAAD,ESCA,TGCT
RP11-303E16.8	THCA,LIHC,THYM,CHOL
RP11-304L19.11	THYM,KICH,UVM,DLBC
RP11-307C12.12	LGG,THCA,PAAD,UVM
RP11-311F12.2	HNSC,LUSC,CESC,ESCA
RP11-319G6.1	TGCT,THYM,KICH,UVM
RP11-320N7.2	THCA,LUSC,TGCT,THYM
RP11-321G12.1	THCA,KIRP,THYM,CHOL
RP11-322D14.2	STAD,LAML,ESCA,DLBC
RP11-325K4.2	LAML,THYM,KICH,UVM
RP11-325K4.3	LUSC,LAML,ESCA,THYM
RP11-326I11.3	SARC,TGCT,MESO,CHOL
RP11-327P2.5	KIRC,THCA,DLBC,CHOL
RP11-329B9.4	THCA,THYM,MESO,CHOL
RP11-330M19.1	SARC,TGCT,KICH,MESO
RP11-332H18.3	TGCT,THYM,DLBC,CHOL
RP11-333O1.1	STAD,ESCA,THYM,DLBC
RP11-334C17.5	LGG,PRAD,LAML,UVM
RP11-335K5.2	LUSC,TGCT,THYM,ACC
RP11-347P5.1	LAML,ESCA,THYM,CHOL
RP11-348J12.5	SKCM,CESC,TGCT,CHOL
RP11-348N5.7	THCA,ESCA,TGCT,DLBC
RP11-34P13.13	TGCT,THYM,DLBC,UCS
RP11-352M15.2	TGCT,KICH,UVM,CHOL
RP11-355N15.3	SARC,LAML,THYM,CHOL
RP11-359E10.1	THCA,PRAD,TGCT,UVM
RP11-365P13.5	KIRC,SKCM,UVM,CHOL
RP11-366L20.2	OV,LAML,TGCT,CHOL
RP11-366L5.1	BRCA,TGCT,THYM,UVM
RP11-373D23.3	GBM,PCPG,TGCT,UCS
RP11-379H18.1	THCA,TGCT,THYM,CHOL
RP11-37B2.1	OV,PCPG,THYM,ACC
RP11-381O6.1	STAD,KIRP,ACC,CHOL
RP11-384C4.2	TGCT,THYM,UVM,CHOL
RP11-386G11.5	LUAD,CESC,TGCT,CHOL
RP11-386M24.3	ESCA,THYM,KICH,UVM
RP11-38L15.3	LUSC,SKCM,LAML,THYM
RP11-390K5.6	GBM,PAAD,THYM,UVM
RP11-395N3.1	BRCA,THCA,THYM,CHOL
RP11-401P9.5	SARC,TGCT,ACC,DLBC
RP11-403P17.6	PAAD,TGCT,THYM,CHOL
RP11-415F23.3	LAML,KICH,UVM,CHOL
RP11-426C22.4	KIRC,THCA,PAAD,TGCT
RP11-428J1.5	KIRP,KICH,ACC,UVM
RP11-42O15.3	GBM,THCA,TGCT,CHOL
RP11-430B1.2	LGG,LIHC,TGCT,ACC
RP11-430C7.4	GBM,PCPG,THYM,DLBC
RP11-430E17.1	THCA,KICH,ACC,CHOL
RP11-435O5.2	TGCT,THYM,UVM,CHOL
RP11-435O5.5	TGCT,THYM,KICH,UVM
RP11-440L14.1	THCA,TGCT,UCS,CHOL
RP11-441O15.3	GBM,THCA,KICH,UVM
RP11-445F12.2	OV,KIRP,TGCT,CHOL
RP11-44N11.2	OV,THCA,TGCT,KICH
RP11-44N12.5	BLCA,SARC,TGCT,MESO
RP11-455F5.3	THCA,THYM,KICH,UVM
RP11-455O6.2	KIRC,PCPG,KICH,CHOL
RP11-465B22.8	THCA,PAAD,TGCT,CHOL
RP11-476D10.1	LUAD,THCA,LUSC,KICH
RP11-477H21.2	LIHC,SARC,LAML,TGCT
RP11-478C19.2	THYM,UVM,UCS,CHOL
RP11-481J2.3	ESCA,THYM,DLBC,CHOL
RP11-485G7.6	THYM,KICH,DLBC,CHOL
RP11-486G15.2	LGG,THCA,THYM,UVM
RP11-486O12.2	KIRC,PAAD,UVM,CHOL
RP11-491F9.1	THCA,SKCM,COAD,SARC
RP11-49I11.1	GBM,TGCT,THYM,UCS
RP11-49I11.4	KIRC,ESCA,TGCT,CHOL
RP11-506B6.6	PRAD,SKCM,SARC,THYM
RP11-519G16.3	THCA,BLCA,MESO,DLBC
RP11-525G13.2	PRAD,LAML,UCS,CHOL
RP11-528A4.2	BLCA,PAAD,TGCT,KICH
RP11-529E10.6	THYM,KICH,DLBC,CHOL
RP11-52L5.6	THYM,ACC,DLBC,UCS
RP11-53M11.3	THCA,PAAD,KICH,MESO
RP11-544M22.1	LUAD,PRAD,TGCT,ACC
RP11-545E17.3	PRAD,TGCT,THYM,UVM
RP11-545I5.3	PRAD,THYM,DLBC,CHOL
RP11-54O7.16	OV,LAML,TGCT,KICH
RP11-552D4.1	GBM,LGG,THYM,ACC
RP11-552F3.10	BRCA,LAML,ESCA,CHOL
RP11-553L6.5	PAAD,ESCA,TGCT,UVM
RP11-557H15.3	ESCA,KICH,UVM,CHOL
RP11-563J2.3	THYM,KICH,UVM,CHOL
RP11-563K23.1	COAD,PCPG,TGCT,THYM
RP11-567E21.3	LGG,THCA,KIRP,SARC
RP11-573D15.8	LUSC,TGCT,KICH,CHOL
RP11-576I22.2	BRCA,TGCT,THYM,UCS
RP11-582E3.6	BLCA,ESCA,TGCT,UVM
RP11-582J16.4	KIRC,CESC,LAML,TGCT
RP11-59C5.3	THCA,CESC,THYM,ACC
RP11-610P16.1	THCA,TGCT,KICH,CHOL
RP11-613M10.6	BLCA,TGCT,ACC,UVM
RP11-619A14.3	STAD,TGCT,THYM,CHOL
RP11-631N16.4	KIRC,LGG,UVM,CHOL
RP11-646I6.6	KIRP,KICH,UVM,CHOL
RP11-676J15.1	THCA,LAML,UVM,CHOL
RP11-680A11.5	SARC,LAML,UCS,CHOL
RP11-685G9.2	SKCM,DLBC,UCS,CHOL
RP11-686D22.4	GBM,SKCM,BLCA,ESCA
RP11-689B22.2	THCA,LUSC,TGCT,DLBC
RP11-699C17.1	BRCA,THCA,BLCA,ESCA
RP11-6I2.3	TGCT,ACC,MESO,UVM
RP11-6N17.4	THYM,ACC,DLBC,CHOL
RP11-701H24.4	ESCA,TGCT,THYM,ACC
RP11-701H24.7	LAML,ESCA,ACC,UVM
RP11-706C16.7	HNSC,ESCA,KICH,CHOL
RP11-707M3.3	TGCT,THYM,KICH,CHOL
RP11-710F7.2	BRCA,LUAD,TGCT,THYM
RP11-712B9.2	LUSC,BLCA,LAML,DLBC
RP11-712L6.5	SKCM,TGCT,THYM,KICH
RP11-714G18.1	LUAD,THCA,LAML,MESO
RP11-727F15.12	THYM,ACC,DLBC,UCS
RP11-73M18.7	ESCA,PCPG,TGCT,ACC
RP11-73M18.8	THCA,ESCA,TGCT,THYM
RP11-73M7.1	BLCA,ESCA,THYM,CHOL
RP11-767N6.7	LGG,PCPG,TGCT,THYM
RP11-785H5.1	TGCT,KICH,DLBC,CHOL
RP11-793A3.2	LUSC,BLCA,CESC,LAML
RP11-793H13.11	THCA,TGCT,THYM,DLBC
RP11-798K3.2	BRCA,KIRC,PAAD,KICH
RP11-799D4.4	THYM,KICH,DLBC,CHOL
RP11-7I15.4	BRCA,GBM,PRAD,CHOL
RP11-800A3.7	LAML,TGCT,THYM,KICH
RP11-806H10.4	TGCT,THYM,KICH,DLBC
RP11-806L2.2	THCA,PRAD,UCS,CHOL
RP11-817J15.2	BRCA,OV,THCA,PRAD
RP11-81K13.1	BRCA,PRAD,ACC,CHOL
RP11-845M18.6	LUAD,THCA,PRAD,THYM
RP11-848P1.5	GBM,THCA,TGCT,THYM
RP11-849F2.9	TGCT,THYM,UVM,DLBC
RP11-84C10.4	LUSC,COAD,THYM,CHOL
RP11-84D1.1	OV,SKCM,LAML,DLBC
RP11-85B7.2	LAML,TGCT,THYM,KICH
RP11-864I4.4	THYM,KICH,UVM,CHOL
RP11-864J10.4	TGCT,THYM,KICH,UVM
RP11-875O11.1	LUSC,PRAD,THYM,DLBC
RP11-876N24.5	THCA,CESC,LAML,KICH
RP11-87G24.3	LAML,TGCT,THYM,DLBC
RP11-884K10.6	BRCA,BLCA,PCPG,CHOL
RP11-88I18.2	LGG,TGCT,THYM,UVM
RP11-88I18.3	PRAD,SARC,KICH,ACC
RP11-90B9.2	TGCT,THYM,UVM,CHOL
RP11-96H19.1	THCA,LAML,TGCT,THYM
RP11-973N13.4	THCA,SARC,UCS,CHOL
RP11-977G19.11	GBM,THCA,THYM,KICH
RP11-97C16.1	SKCM,THYM,UVM,UCS
RP11-981P6.1	LAML,THYM,UVM,DLBC
RP11-98D18.9	LUAD,THCA,TGCT,MESO
RP11-9G1.3	PRAD,SARC,TGCT,KICH
RP13-104F24.2	THCA,KICH,UVM,CHOL
RP13-122B23.8	KIRC,PCPG,MESO,CHOL
RP13-582O9.5	PRAD,LIHC,THYM,CHOL
RP13-582O9.7	BRCA,OV,KIRP,UCS
RP13-895J2.2	THCA,KIRP,THYM,KICH
RP13-977J11.2	THYM,KICH,DLBC,CHOL
RP3-355L5.4	TGCT,THYM,UVM,UCS
RP3-395M20.2	GBM,LUSC,ESCA,PCPG
RP3-434P1.6	KIRC,KIRP,KICH,CHOL
RP3-467K16.2	THCA,PRAD,KICH,ACC
RP3-492J12.2	SKCM,PAAD,ESCA,THYM
RP3-508I15.9	LAML,TGCT,UVM,CHOL
RP4-545C24.1	LUSC,LAML,THYM,ACC
RP4-563E14.1	COAD,TGCT,KICH,CHOL
RP4-564M11.2	LUAD,THCA,LUSC,KIRP
RP4-575N6.5	LUAD,KIRC,LGG,LAML
RP4-584D14.5	ESCA,THYM,KICH,UCS
RP4-622L5.7	LGG,THYM,UVM,CHOL
RP4-666F24.3	GBM,LUSC,THYM,KICH
RP4-681N20.5	GBM,SARC,THYM,UVM
RP4-717I23.3	GBM,TGCT,UVM,CHOL
RP4-758J18.13	LGG,TGCT,DLBC,CHOL
RP4-769N13.6	KIRC,SKCM,KIRP,DLBC
RP4-816N1.6	THYM,KICH,UVM,DLBC
RP5-1029K10.2	THCA,LUSC,ESCA,TGCT
RP5-1042I8.7	PCPG,TGCT,THYM,KICH
RP5-1085F17.3	LGG,TGCT,THYM,CHOL
RP5-1107A17.4	LAML,ESCA,THYM,UVM
RP5-1112D6.4	OV,ESCA,TGCT,THYM
RP5-1119A7.17	GBM,LGG,ACC,UVM
RP5-1142A6.2	GBM,STAD,PCPG,MESO
RP5-1159O4.1	LGG,THCA,THYM,UVM
RP5-1159O4.2	THCA,THYM,UVM,DLBC
RP5-1184F4.5	STAD,THYM,DLBC,CHOL
RP5-821D11.7	THYM,KICH,ACC,CHOL
RP5-881L22.5	COAD,READ,KICH,MESO
RP5-901A4.1	PRAD,KIRP,LAML,CHOL
RP5-907D15.4	THCA,PAAD,TGCT,KICH
RP5-908M14.9	BRCA,KIRC,THYM,CHOL
RP5-981O7.2	THYM,UVM,DLBC,CHOL
RPARP-AS1	PAAD,TGCT,DLBC,UCS
SCARNA15	PRAD,TGCT,KICH,CHOL
SLC26A4-AS1	LUAD,THCA,LUSC,UVM
SNAI3-AS1	TGCT,ACC,UVM,CHOL
SNHG10	PRAD,READ,UVM,DLBC
SNHG18	LGG,PRAD,BLCA,TGCT
SNHG4	PRAD,PAAD,TGCT,UVM
SOX2-OT	LUSC,CESC,TGCT,THYM
SOX9-AS1	THCA,SARC,TGCT,CHOL
ST6GAL2-IT1	LGG,THCA,TGCT,UCS
STEAP2-AS1	LUAD,KICH,MESO,CHOL
STX18-AS1	KIRC,THCA,KICH,ACC
STXBP5-AS1	HNSC,PRAD,ESCA,MESO
THAP9-AS1	THYM,UVM,DLBC,CHOL
TMEM191C	BLCA,TGCT,THYM,CHOL
TMEM44-AS1	THCA,ESCA,KICH,UVM
TOLLIP-AS1	TGCT,THYM,KICH,UVM
TRIM31-AS1	BRCA,OV,THYM,ACC
TTC39A-AS1	OV,PAAD,READ,CHOL
TYMSOS	BRCA,THCA,BLCA,ESCA
U47924.27	KIRC,TGCT,THYM,CHOL
U52111.14	SARC,THYM,ACC,CHOL
U73166.2	PRAD,TGCT,THYM,CHOL
U91328.22	KIRP,TGCT,UVM,CHOL
UMAD1	THYM,KICH,UVM,CHOL
USP27X-AS1	THCA,TGCT,THYM,DLBC
USP46-AS1	KIRC,THCA,KIRP,THYM
VCAN-AS1	KIRC,LAML,TGCT,MESO
XXbac-B135H6.15	PRAD,CESC,DLBC,CHOL
XXbac-B461K10.4	SARC,LAML,THYM,UVM
XXbac-BPG27H4.8	TGCT,THYM,KICH,CHOL
XXyac-YM21GA2.4	LAML,TGCT,KICH,CHOL
XXyac-YM21GA2.7	KIRP,THYM,KICH,CHOL
ZBED3-AS1	HNSC,LAML,TGCT,KICH
ZBED5-AS1	TGCT,THYM,UVM,CHOL
ZNF529-AS1	GBM,ESCA,UCS,CHOL
ZNF790-AS1	TGCT,THYM,UCS,CHOL
AC000067.1	TGCT,THYM,CHOL
AC002064.4	BRCA,STAD,LAML
AC002066.1	LUSC,BLCA,TGCT
AC002480.3	PCPG,TGCT,CHOL
AC003986.6	TGCT,THYM,UCS
AC004791.2	SARC,LAML,TGCT
AC004837.5	TGCT,KICH,DLBC
AC004951.6	OV,STAD,TGCT
AC005042.4	LAML,THYM,CHOL
AC005062.2	LUAD,THCA,TGCT
AC005076.5	GBM,TGCT,THYM
AC005264.2	KIRC,LAML,THYM
AC005306.3	GBM,LAML,CHOL
AC005498.3	SARC,TGCT,CHOL
AC005550.3	MESO,UVM,CHOL
AC005682.5	BRCA,PCPG,TGCT
AC006262.4	KIRC,THCA,MESO
AC007036.6	LAML,ACC,DLBC
AC007349.4	PAAD,KICH,CHOL
AC008063.2	THCA,THYM,KICH
AC008074.4	ESCA,TGCT,CHOL
AC008079.10	SKCM,LAML,CHOL
AC008746.12	THCA,UVM,CHOL
AC009014.3	KIRC,KICH,CHOL
AC009095.4	UVM,UCS,CHOL
AC009948.5	TGCT,UVM,CHOL
AC010127.3	KIRC,LAML,THYM
AC010761.13	THYM,UVM,CHOL
AC010761.8	THYM,UVM,DLBC
AC010890.1	OV,LUAD,KICH
AC010894.3	THYM,UVM,DLBC
AC011523.2	PRAD,KICH,ACC
AC012354.6	LUSC,BLCA,UVM
AC012668.2	THCA,TGCT,CHOL
AC016735.2	BRCA,THYM,KICH
AC018647.3	LUAD,TGCT,CHOL
AC019117.2	THCA,LUSC,TGCT
AC019185.4	OV,LAML,CHOL
AC021188.4	BLCA,PAAD,TGCT
AC021218.2	PAAD,TGCT,KICH
AC025016.1	BRCA,ESCA,UCS
AC025171.1	TGCT,THYM,UVM
AC025811.3	BRCA,KIRC,ACC
AC053503.6	PRAD,READ,TGCT
AC061992.2	LGG,KICH,DLBC
AC068580.5	LAML,THYM,DLBC
AC072062.1	LAML,TGCT,THYM
AC073257.2	KIRC,PCPG,KICH
AC073635.5	LUSC,CESC,UVM
AC074011.2	SKCM,LAML,MESO
AC074117.10	TGCT,THYM,CHOL
AC074363.1	LGG,SKCM,READ
AC078842.3	THCA,PCPG,KICH
AC079135.1	TGCT,KICH,UVM
AC079145.4	THYM,KICH,UVM
AC083843.1	UVM,DLBC,CHOL
AC083884.8	LAML,THYM,CHOL
AC087491.2	LUSC,COAD,TGCT
AC090587.4	TGCT,KICH,UCS
AC092597.3	LAML,KICH,MESO
AC092614.2	OV,BLCA,KICH
AC093609.1	THCA,THYM,CHOL
AC096772.6	GBM,TGCT,DLBC
AC097713.4	LAML,THYM,DLBC
AC097721.2	THYM,UCS,CHOL
AC098823.3	GBM,LGG,TGCT
AC100830.5	THYM,DLBC,UCS
AC104389.28	HNSC,LUSC,DLBC
AC104654.2	BLCA,TGCT,DLBC
AC114730.11	GBM,THYM,UVM
AC133785.1	ESCA,DLBC,CHOL
AC137932.4	GBM,LUSC,UVM
AC145124.2	TGCT,THYM,UVM
ADAM20P1	GBM,THYM,UVM
AE000661.37	THCA,TGCT,THYM
AF064858.6	PRAD,TGCT,CHOL
AF127936.7	THYM,UVM,CHOL
AF131216.5	THCA,TGCT,THYM
AF131217.1	PRAD,DLBC,CHOL
AJ011931.1	LAML,TGCT,THYM
AL022476.2	TGCT,THYM,CHOL
AL136419.6	THYM,UCS,CHOL
AP000251.3	TGCT,THYM,KICH
AP000432.1	PRAD,LAML,TGCT
AP000439.1	GBM,LGG,CHOL
AP000473.5	STAD,TGCT,CHOL
AP001271.3	LUSC,STAD,CHOL
AP001469.7	THYM,UVM,CHOL
AP001471.1	TGCT,THYM,KICH
AP001627.1	BRCA,LAML,TGCT
ASH1L-AS1	KICH,ACC,CHOL
ATP1B3-AS1	TGCT,THYM,UVM
ATP2A1-AS1	THYM,DLBC,CHOL
BAALC-AS2	GBM,LAML,KICH
BDNF-AS	GBM,KIRP,THYM
C10orf71-AS1	SARC,PCPG,KICH
C20orf203	LGG,LAML,TGCT
C8orf31	TGCT,THYM,KICH
CBR3-AS1	BRCA,TGCT,THYM
CD27-AS1	TGCT,KICH,CHOL
CERS3-AS1	PRAD,ESCA,THYM
CH17-262A2.1	LAML,UVM,CHOL
CH17-264L24.1	GBM,TGCT,CHOL
CH17-302M23.1	LUSC,LAML,ESCA
CH17-360D5.1	STAD,CESC,ESCA
CITF22-1A6.3	LAML,KICH,CHOL
CMB9-55A18.1	TGCT,THYM,UVM
CROCCP2	THYM,UVM,CHOL
CTA-292E10.6	GBM,THCA,THYM
CTA-331P3.1	LAML,THYM,UCS
CTA-941F9.9	TGCT,KICH,CHOL
CTB-113P19.1	GBM,LGG,READ
CTB-113P19.4	LUSC,BLCA,THYM
CTB-178M22.2	TGCT,KICH,CHOL
CTB-179K24.3	TGCT,UVM,CHOL
CTB-26E19.1	LAML,TGCT,THYM
CTB-31O20.2	TGCT,THYM,KICH
CTB-49A3.2	LUAD,TGCT,ACC
CTB-58E17.3	THYM,KICH,CHOL
CTB-78F1.2	THCA,THYM,CHOL
CTC-235G5.3	PCPG,READ,ACC
CTC-248O19.1	KIRC,THYM,CHOL
CTC-251D13.1	LUSC,LAML,CHOL
CTC-260E6.6	LAML,TGCT,DLBC
CTC-327F10.5	KIRC,BLCA,CESC
CTC-332L22.1	THYM,KICH,CHOL
CTC-360G5.9	OV,CESC,MESO
CTC-429P9.3	TGCT,DLBC,CHOL
CTC-441N14.1	GBM,LGG,THCA
CTC-448F2.4	TGCT,THYM,UCS
CTC-498J12.1	KICH,UVM,CHOL
CTC-518B2.9	THCA,PRAD,THYM
CTC-523E23.1	LAML,TGCT,UVM
CTC-523E23.11	TGCT,THYM,KICH
CTC-523E23.5	LAML,THYM,UVM
CTC-537E7.3	THYM,KICH,CHOL
CTC-559E9.1	TGCT,THYM,UVM
CTC-559E9.6	BLCA,PAAD,CHOL
CTD-2007L18.5	TGCT,THYM,UVM
CTD-2012J19.3	TGCT,UVM,CHOL
CTD-2012K14.8	TGCT,DLBC,CHOL
CTD-2020K17.3	THYM,DLBC,CHOL
CTD-2021H9.3	TGCT,THYM,KICH
CTD-2026K11.6	TGCT,UVM,CHOL
CTD-2047H16.2	OV,DLBC,CHOL
CTD-2047H16.5	THCA,TGCT,CHOL
CTD-2081C10.7	BRCA,KIRC,LAML
CTD-2083E4.4	TGCT,UVM,CHOL
CTD-2126E3.3	PRAD,KICH,DLBC
CTD-2154I11.2	THCA,THYM,DLBC
CTD-2165H16.4	THYM,UVM,DLBC
CTD-2184C24.2	PRAD,THYM,CHOL
CTD-2194A8.2	KIRP,KICH,CHOL
CTD-2227E11.1	PRAD,THYM,KICH
CTD-2256P15.2	LUAD,THYM,DLBC
CTD-2260A17.2	TGCT,KICH,UVM
CTD-2287O16.5	KICH,UVM,CHOL
CTD-2325P2.3	TGCT,THYM,UCS
CTD-2325P2.4	TGCT,DLBC,CHOL
CTD-2330J20.2	OV,KIRC,KIRP
CTD-2331H12.7	BLCA,THYM,CHOL
CTD-2332E11.2	BLCA,PCPG,ACC
CTD-2336O2.1	KIRP,DLBC,CHOL
CTD-2349P21.12	PCPG,TGCT,CHOL
CTD-2349P21.9	TGCT,UVM,CHOL
CTD-2383M3.1	OV,CESC,KICH
CTD-2503O16.4	STAD,THYM,CHOL
CTD-2506J14.1	SKCM,THYM,DLBC
CTD-2529O21.1	LAML,UVM,CHOL
CTD-2530N21.4	THYM,KICH,MESO
CTD-2531D15.4	LUAD,LAML,KICH
CTD-2532N20.1	TGCT,DLBC,CHOL
CTD-2545H1.2	LAML,KICH,CHOL
CTD-2554C21.3	TGCT,KICH,UVM
CTD-2600O9.1	CESC,TGCT,KICH
CTD-2619J13.27	THYM,KICH,CHOL
CTD-2619J13.9	SKCM,SARC,MESO
CTD-2626G11.2	KIRC,KIRP,THYM
[truncated: 5,040 more rows]
